# Supplementary material for: Risk of thrombocytopenia and thromboembolism after covid-19 vaccination and SARS-CoV-2 positive testing: self-controlled case series study
Source: HighWire-hosted journal article supplement (doi:10.1136/bmj.n1931), 2021-08-26
Supplement: hipj066873.ww.pdf [file hipj066873.ww.pdf]

Supplementary figure 1: Self-controlled case series study design. Each patient is followed from index date to study end date and censored if dead or had second dose of vaccine. Only patients who had experienced the outcome are observed. Each patient can experience the outcome in one of the following intervals: the baseline interval (29 days or more before exposure date), pre-risk interval (1 to 28 days before exposure date) or one of the risk interval post-exposure. We considered three exposures: Oxford/AstraZeneca vaccine, Pfizer/BioNTech vaccine, positive SARS-CoV-2 test.

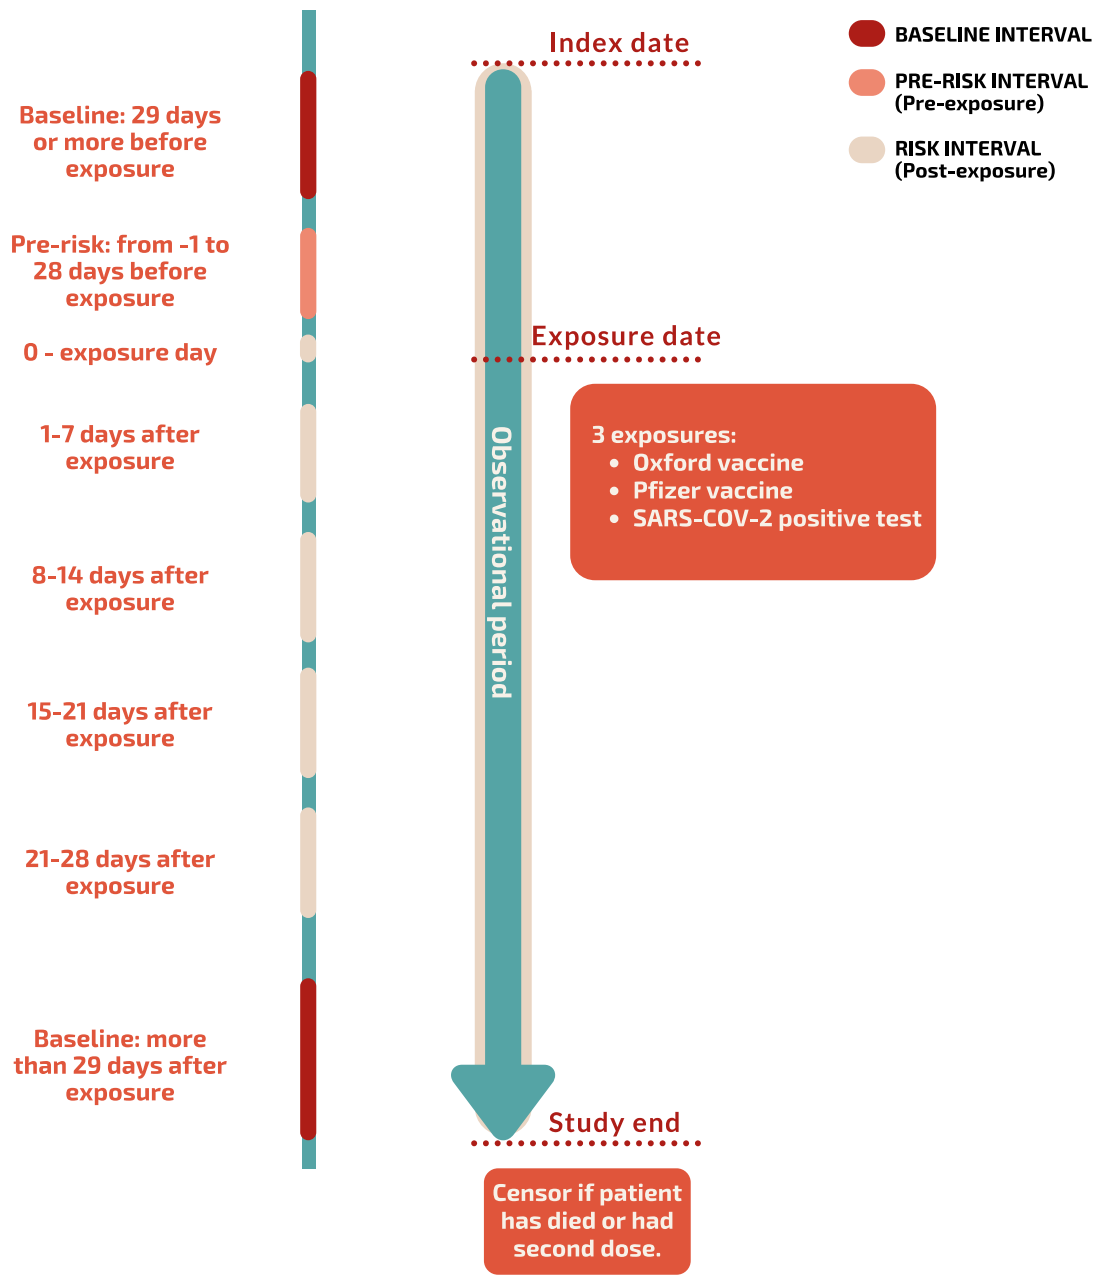

## Supplementary Figure 2a

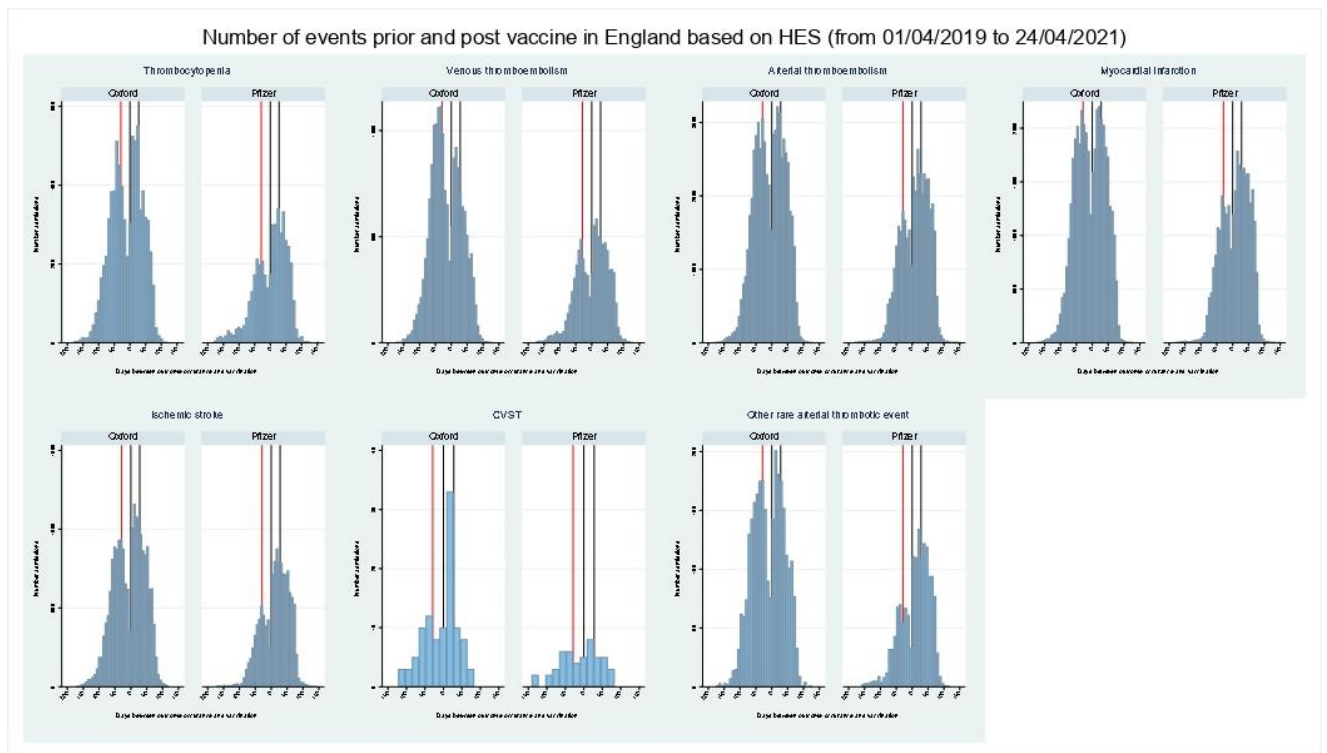

## Supplementary Figure 2b

Time between end of study or censored date and outcome occurrence (from 01/04/2019 to 24/04/2021)  
in England based on HES and SUS plus

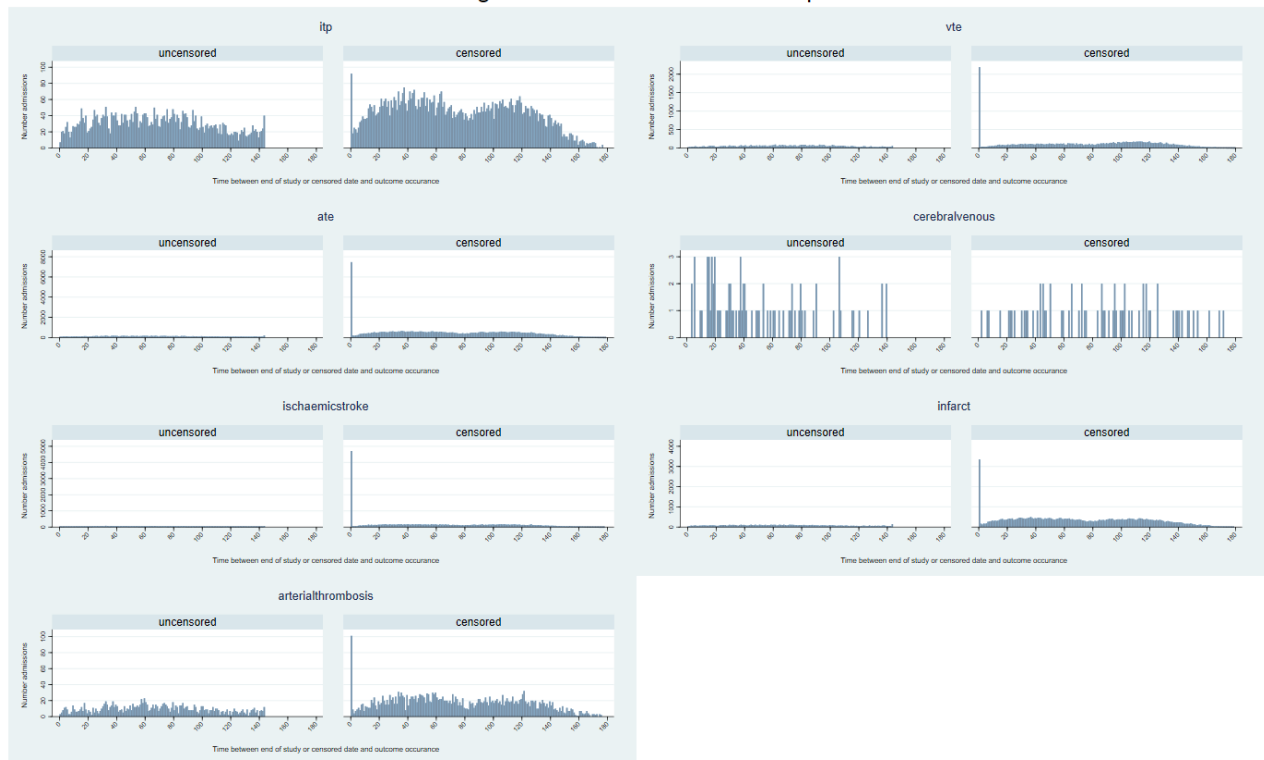

**Supplementary figure 3a: Incidence rate ratios (IRR 95% CI) for outcomes in pre-defined risk periods immediately before and after exposure to the ChAdOx1nCoV-19 vaccination and before and after a positive SARS-CoV-2 test result from December 1, 2020 to April 24, 2021. Comparisons between different sensitivity analyses.**

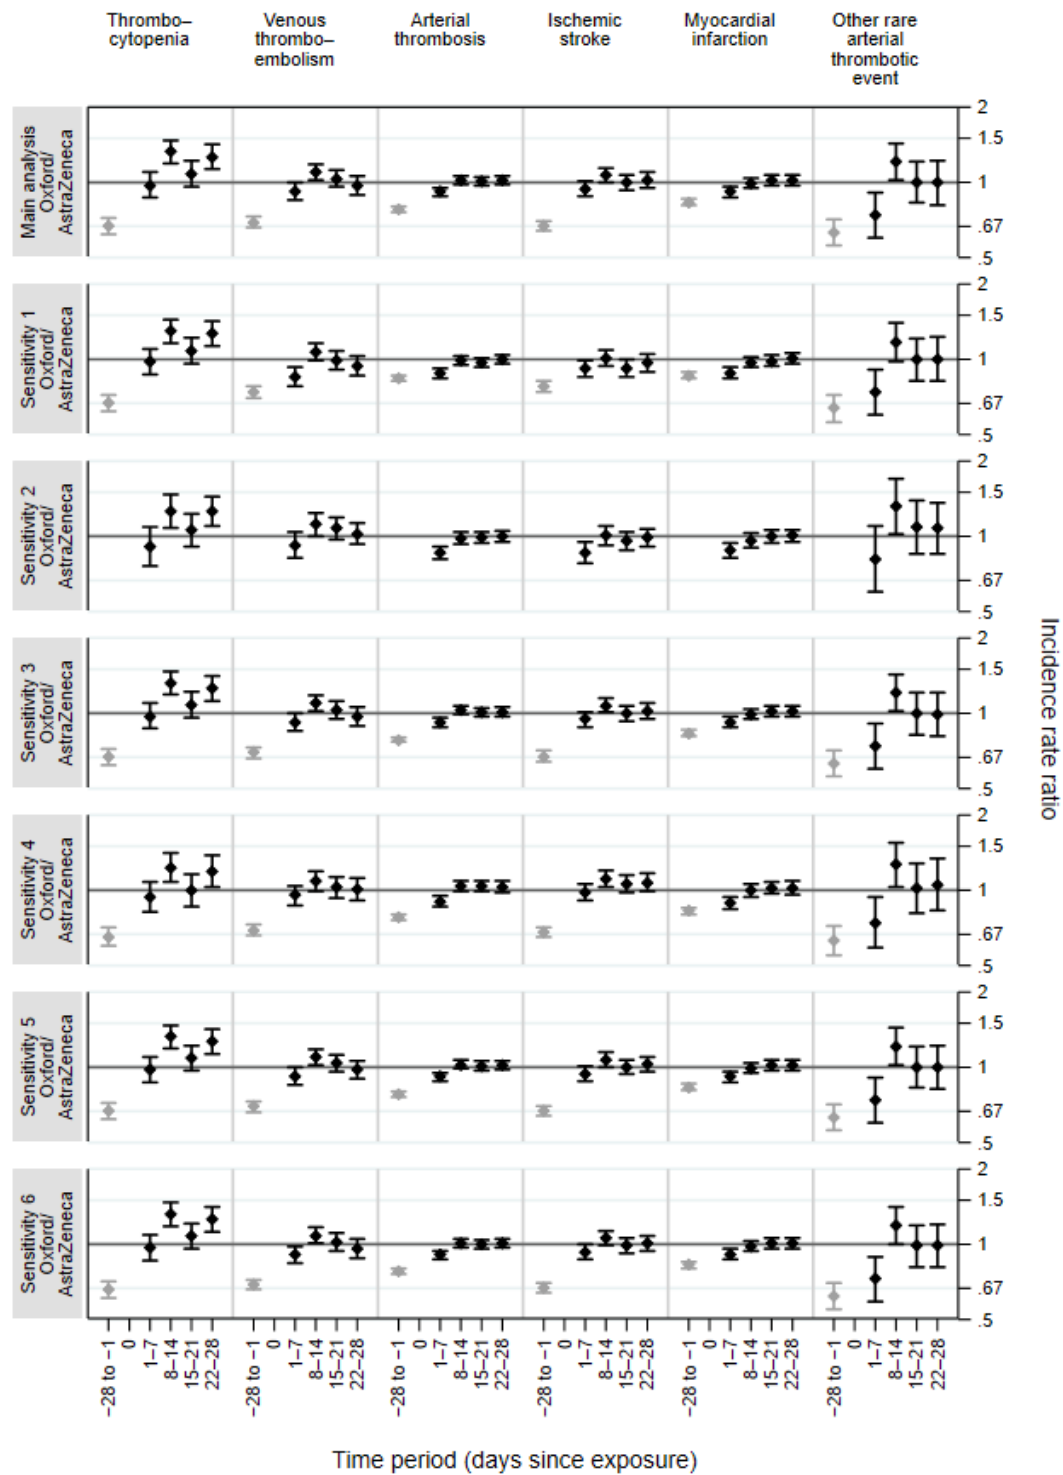

Supplementary figure 3b: Incidence rate ratios (IRR 95% CI) for outcomes in pre-defined risk periods immediately before and after exposure to the BNT162b2 mRNA vaccination and before and after a positive SARS-CoV-2 test result from December 1, 2020 to April 24, 2021. Comparisons between different sensitivity analyses.

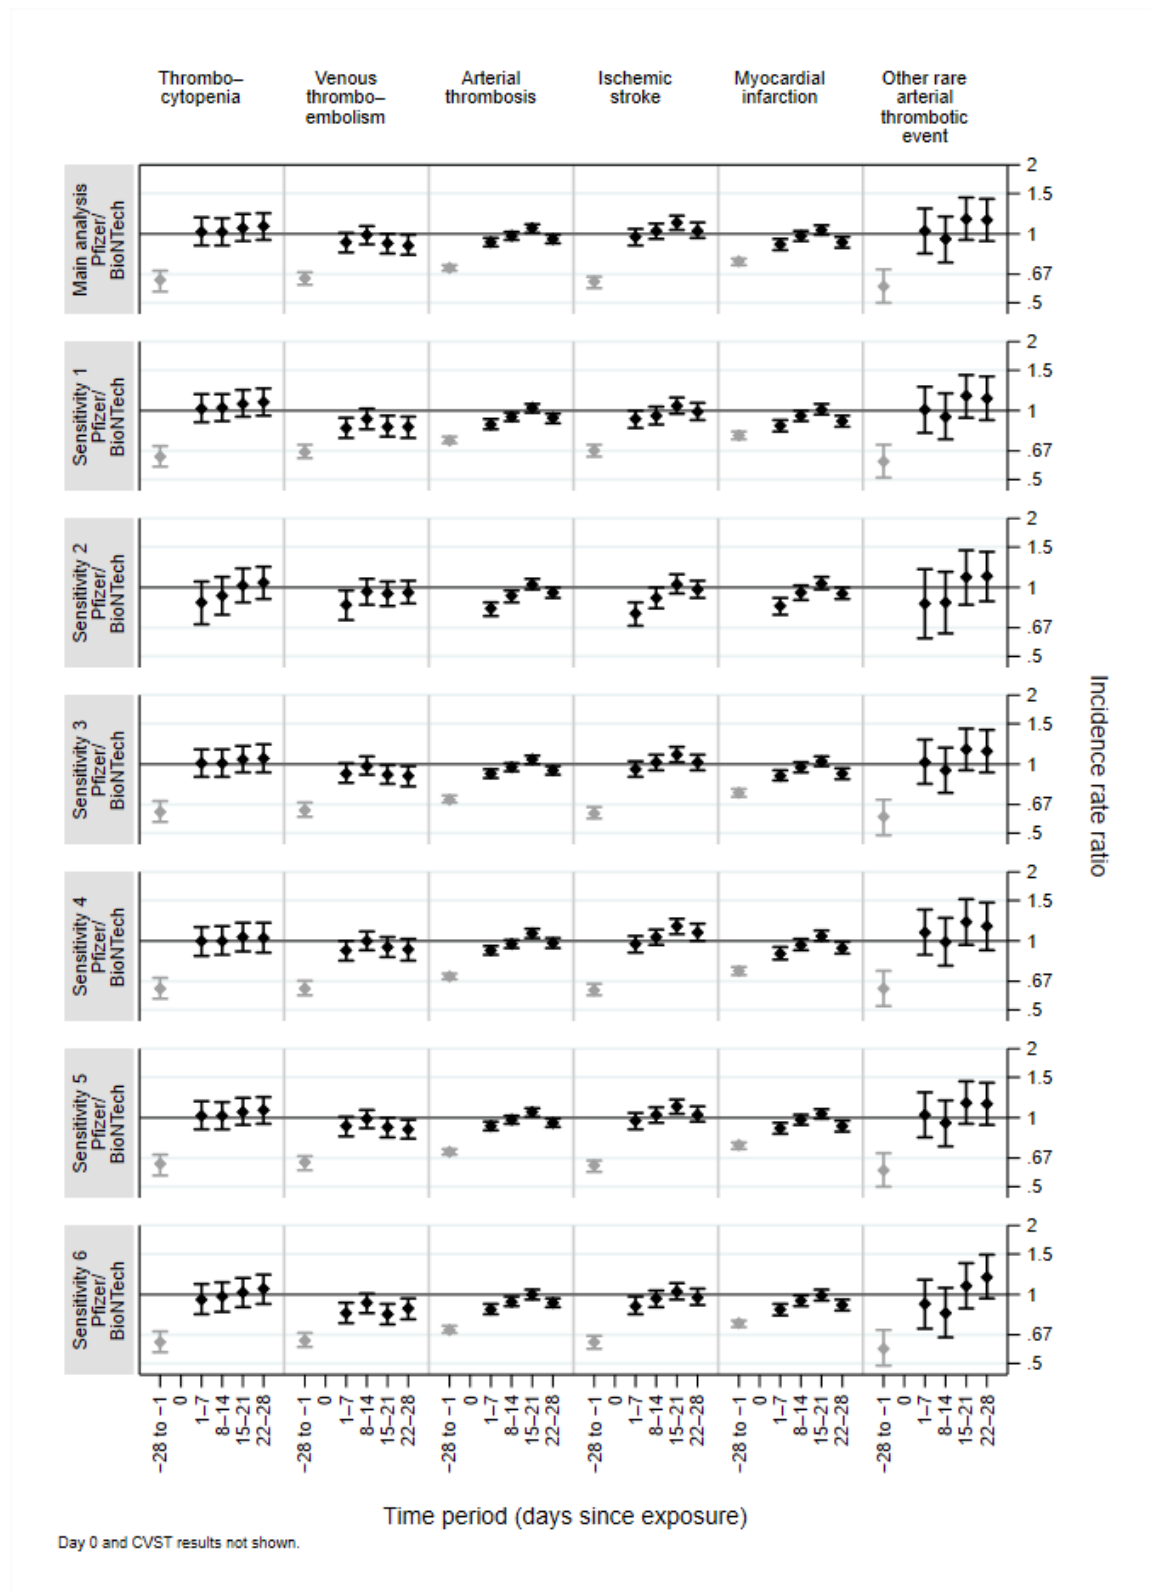

**Supplementary table 1: ICD-10 codes used to identify cases with each outcome.**

| <b>Outcome</b>                | <b>ICD-10 code and description</b>                                     |
|-------------------------------|------------------------------------------------------------------------|
| <b>Thrombocytopenia</b>       | D693 - Idiopathic thrombocytopenic purpura                             |
|                               | D694 - Other primary thrombocytopenia                                  |
|                               | D695 - Secondary thrombocytopenia                                      |
|                               | D696 - Thrombocytopenia, unspecified                                   |
|                               |                                                                        |
| <b>Venous thromboembolism</b> | I26 - Pulmonary embolism                                               |
|                               | I260 - Pulmonary embolism with mention of acute cor pulmonale          |
|                               | I269 - Pulmonary embolism without mention of acute cor pulmonale       |
|                               | I81 - Portal vein thrombosis                                           |
|                               | I81X - Portal vein thrombosis                                          |
|                               | I82 - Other venous embolism and thrombosis                             |
|                               | I820 - Budd-Chiari syndrome                                            |
|                               | I822 - Embolism and thrombosis of vena cava                            |
|                               | I823 - Embolism and thrombosis of renal vein                           |
|                               | I828 - Embolism and thrombosis of other specified veins                |
|                               | I829 - Embolism and thrombosis of unspecified vein                     |
|                               |                                                                        |
| <b>Arterial thrombosis</b>    | I74 - Arterial embolism and thrombosis                                 |
|                               | I740 - Embolism and thrombosis of abdominal aorta                      |
|                               | I741 - Embolism and thrombosis of other and unspecified parts of aorta |
|                               | I742 - Embolism and thrombosis of arteries of upper extremities        |
|                               | I743 - Embolism and thrombosis of arteries of lower extremities        |
|                               | I744 - Embolism and thrombosis of arteries of extremities, unspecified |
|                               | I745 - Embolism and thrombosis of iliac artery                         |
|                               | I748 - Embolism and thrombosis of other arteries                       |

|                                         |                                                                                             |
|-----------------------------------------|---------------------------------------------------------------------------------------------|
|                                         | I749 - Embolism and thrombosis of unspecified artery                                        |
|                                         |                                                                                             |
| <b>Cerebral venous sinus thrombosis</b> | O225 - Cerebral venous thrombosis in pregnancy                                              |
|                                         | O873 - Cerebral venous thrombosis in the puerperium                                         |
|                                         | I636 - Cerebral infarction due to cerebral venous thrombosis                                |
|                                         | I676 – Non-pyogenic thrombosis of intracranial venous system                                |
|                                         |                                                                                             |
| <b>Ischaemic stroke</b>                 | G45 - Transient cerebral ischaemic attacks and related syndromes                            |
|                                         | G450 - Vertebrobasilar artery syndrome                                                      |
|                                         | G451 - Carotid artery syndrome (hemispheric)                                                |
|                                         | G452 - Multiple and bilateral precerebral artery syndromes                                  |
|                                         | G453 - Amaurosis fugax                                                                      |
|                                         | G454 - Transient global amnesia                                                             |
|                                         | G458 - Other transient cerebral ischaemic attacks and related syndromes                     |
|                                         | G459 - Transient cerebral ischaemic attack, unspecified                                     |
|                                         | I63 - Cerebral infarction                                                                   |
|                                         | I630 - Cerebral infarction due to thrombosis of precerebral arteries                        |
|                                         | I631 - Cerebral infarction due to embolism of precerebral arteries                          |
|                                         | I632 - Cerebral infarction due to unspecified occlusion or stenosis of precerebral arteries |
|                                         | I633 - Cerebral infarction due to thrombosis of cerebral arteries                           |
|                                         | I634 - Cerebral infarction due to embolism of cerebral arteries                             |
|                                         | I635 - Cerebral infarction due to unspecified occlusion or stenosis of cerebral arteries    |
|                                         | I636 - Cerebral infarction due to cerebral venous thrombosis, non-pyogenic                  |
|                                         | I638 - Other cerebral infarction                                                            |
|                                         | I639 - Cerebral infarction, unspecified                                                     |
|                                         | I64 - Stroke, not specified as haemorrhage or infarction                                    |
|                                         | I64X - Stroke, not specified as haemorrhage or infarction                                   |
|                                         |                                                                                             |
|                                         | I21 - Acute myocardial infarction                                                           |

|                                  |                                                                                                                     |
|----------------------------------|---------------------------------------------------------------------------------------------------------------------|
| <b>Myocardial infarction</b>     | I210 - Acute transmural myocardial infarction of anterior wall                                                      |
|                                  | I211 - Acute transmural myocardial infarction of inferior wall                                                      |
|                                  | I212 - Acute transmural myocardial infarction of other sites                                                        |
|                                  | I213 - Acute transmural myocardial infarction of unspecified site                                                   |
|                                  | I214 - Acute subendocardial myocardial infarction                                                                   |
|                                  | I219 - Acute myocardial infarction, unspecified                                                                     |
|                                  | I22 - Subsequent myocardial infarction                                                                              |
|                                  | I220 - Subsequent myocardial infarction of anterior wall                                                            |
|                                  | I221 - Subsequent myocardial infarction of inferior wall                                                            |
|                                  | I228 - Subsequent myocardial infarction of other sites                                                              |
|                                  | I229 - Subsequent myocardial infarction of unspecified site                                                         |
|                                  | I23 - Certain current complications following acute myocardial infarction                                           |
|                                  | I230 – Haemo-pericardium as current complication following acute myocardial infarction                              |
|                                  | I231 - Atrial septal defect as current complication following acute myocardial infarction                           |
|                                  | I232 - Ventricular septal defect as current complication following acute myocardial infarction                      |
|                                  | I233 - Rupture of cardiac wall without haemopericardium as current complication following acute myocardial          |
|                                  | I234 - Rupture of chordae tendineae as current complication following acute myocardial infarction                   |
|                                  | I235 - Rupture of papillary muscle as current complication following acute myocardial infarction                    |
|                                  | I236 - Thrombosis of atrium, auricular appendage, and ventricle as current complications following acute myocardial |
|                                  | I238 - Other current complications following acute myocardial infarction                                            |
| I252 - Old myocardial infarction |                                                                                                                     |



**Supplementary table 2: Demographic characteristics of patients who experienced one of the secondary outcomes in the 28 days following a COVID-19 vaccine first dose or SARS-CoV-2 positive test in England amongst the vaccinated population from December 1, 2020 until April 24, 2021 (cells with < 5 are suppressed).**

|                        | Cerebral venous sinus thrombosis (CVST) |                        |                          | Ischaemic Stroke       |                        |                          | Myocardial infarction  |                       |                          | Other Arterial Thrombosis |                        |                          |
|------------------------|-----------------------------------------|------------------------|--------------------------|------------------------|------------------------|--------------------------|------------------------|-----------------------|--------------------------|---------------------------|------------------------|--------------------------|
|                        | ChAdOx1 nCoV-19 vaccine                 | BNT162b 2 mRNA vaccine | Positive SARS-CoV-2 test | ChAdOx1nCoV-19 vaccine | BNT162b 2 mRNA vaccine | Positive SARS-CoV-2 test | ChAdOx1nCoV-19 vaccine | BNT162b2 mRNA vaccine | Positive SARS-CoV-2 test | ChAdOx1 nCoV-19 vaccine   | BNT162b 2 mRNA vaccine | Positive SARS-CoV-2 test |
| Total number of people | 28                                      | 10                     | 8                        | 3976                   | 3167                   | 1160                     | 7901                   | 6544                  | 2919                     | 515                       | 391                    | 245                      |
| Women                  | 60.7 (17)                               | 70.0 (7)               | 62.5 (5)                 | 50.2 (1997)            | 50.1 (1586)            | 44.4 (515)               | 33.6 (2654)            | 33.8 (2211)           | 31.1 (908)               | 41.2 (212)                | 37.3 (146)             | 35.1 (86)                |
| Men                    | 39.3 (11)                               | 30.0 (3)               | 37.5 (3)                 | 49.8 (1979)            | 49.9 (1579)            | 55.6 (645)               | 66.3 (5237)            | 66.2 (4329)           | 68.9 (2011)              | 58.8 (303)                | 62.7 (245)             | 64.9 (159)               |
| Not recorded           | 0                                       | 0                      | 0                        | 0                      | 0.1 (2)                | 0                        | 0.1 (10)               | 0.1 (4)               | 0                        | 0                         | 0                      | 0                        |
| Mean age (SD)          | 49.6 (20.3)                             | 60.5 (20.6)            | 66.5 (9.6)               | 74.8 (12.9)            | 78.8 (11.3)            | 75.0 (14.2)              | 71.3 (12.1)            | 75.9 (11.7)           | 71.8 (13.1)              | 71.4 (12.2)               | 75.4 (11.2)            | 69.2 (13.2)              |
| 16-29 years            | 21.4 (6)                                | 0                      | 0                        | 0.2 (7)                | *                      | *                        | 0.1 (7)                | *                     | 0                        | 0                         | 0                      | *                        |
| 30-39 years            | 17.9 (5)                                | *                      | 0                        | 0.6 (25)               | 0.4 (14)               | <10                      | 0.5 (37)               | <20                   | 0.5 (14)                 | 1.0 (5)                   | 0                      | *                        |
| 40-49 years            | *                                       | *                      | 0                        | 2.2 (86)               | 1.3 (41)               | 4.7 (55)                 | 2.8 (222)              | 1.7 (111)             | 4.1 (120)                | 3.1 (16)                  | 2.3 (9)                | 4.5 (11)                 |
| 50-59 years            | 25.0 (7)                                | *                      | *                        | 9.8 (388)              | 4.8 (152)              | 10.9 (127)               | 14.1 (1114)            | 8.8 (574)             | 14.7 (429)               | 12.8 (66)                 | 7.4 (29)               | 18.0 (44)                |
| 60-69 years            | *                                       | *                      | *                        | 18.4 (732)             | 11.4 (360)             | 14.8 (172)               | 24.9 (1965)            | 16.6 (1088)           | 23.8 (694)               | 24.1 (124)                | 18.9 (74)              | 23.3 (57)                |

|                    |           |            |          |             |             |            |             |             |             |            |            |            |
|--------------------|-----------|------------|----------|-------------|-------------|------------|-------------|-------------|-------------|------------|------------|------------|
| 70-79 years        | *         | *          | *        | 32.0 (1272) | 24.8 (784)  | 23.4 (271) | 34.1 (2696) | 26.9 (1761) | 25.4 (740)  | 34.6 (178) | 30.7 (120) | 29.8 (73)  |
| 80-89 years        | *         | *          | 0        | 23.4 (931)  | 42.7 (1351) | 29.9 (347) | 16.1 (1271) | 36.5 (2386) | 23.1 (675)  | 17.5 (90)  | 34.0 (133) | 18.8 (46)  |
| 90+ years          | *         | 0          | 0        | 13.5 (535)  | 14.6 (461)  | 15.3 (177) | 7.5 (589)   | 9.2 (605)   | 8.5 (247)   | 7.0 (36)   | 6.6 (26)   | 4.1 (10)   |
|                    |           |            |          |             |             |            |             |             |             |            |            |            |
| White              | 82.1 (23) | 100.0 (10) | 62.5 (5) | 88.7 (3526) | 89.7 (2841) | 82.8 (961) | 88.6 (7004) | 89.6 (5866) | 79.7 (2325) | 90.3 (465) | 92.6 (362) | 85.3 (209) |
| Indian             | 0         | 0          | 0.0 (0)  | 2.1 (85)    | 1.8 (57)    | 2.8 (33)   | 2.6 (204)   | 2.8 (186)   | 4.9 (143)   | 1.4 (7)    | 1.5 (6)    | 1.6 (4)    |
| Pakistani          | 0         | 0          | 0.0 (0)  | 1.2 (46)    | 0.8 (26)    | 3.2 (37)   | 1.9 (153)   | 1.5 (98)    | 4.5 (132)   | *          | 0          | 2.0 (5)    |
| Bangladeshi        | *         | 0          | *        | 0.3 (10)    | <10         | 1.1 (13)   | 0.5 (38)    | 0.4 (23)    | 1.6 (47)    | *          | 0          | *          |
| Other Asian        | *         | 0          | 0.0 (0)  | 0.6 (24)    | 0.4 (13)    | <10        | 0.6 (51)    | 0.7 (44)    | 2.0 (59)    | *          | 0          | *          |
| Black Caribbean    | 0         | 0          | 0.0 (0)  | 1.0 (39)    | 0.8 (26)    | 1.3 (15)   | 0.6 (44)    | 0.3 (21)    | 0.9 (26)    | 1.0 (5)    | 1.3 (5)    | *          |
| Black African      | *         | 0          | 0.0 (0)  | 0.7 (28)    | 0.5 (16)    | 1.8 (21)   | 0.4 (35)    | 0.4 (26)    | 0.7 (20)    | *          | *          | *          |
| Chinese            | 0         | 0          | 0.0 (0)  | 0.2 (6)     | *           | *          | 0.1 (11)    | 0.1 (8)     | 0.3 (10)    | 0          | *          | 0          |
| Other ethnic group | 0         | 0          | 0.0 (0)  | 1.0 (39)    | 0.9 (27)    | 2.1 (24)   | 1.1 (89)    | 1.0 (66)    | 2.5 (72)    | *          | 0          | 3.7 (9)    |
| Not recorded       | 7.1 (2)   | 0          | *        | 4.4 (173)   | 4.7 (149)   | 3.8 (44)   | 3.4 (272)   | 3.1 (206)   | 2.9 (85)    | 4.7 (24)   | 3.6 (14)   | 3.3 (8)    |

**Supplementary table 3: Incidence rate ratios (IRR 95% CI) for the two composite outcomes: thrombocytopenia and venous thromboembolism; thrombocytopenia and arterial thromboembolism in pre-defined risk periods immediately before and after exposure to vaccination and before and after a positive SARS-CoV-2 test result, adjusted for calendar time from December 1, 2020 to April 24, 2021**

|                                                    | Time period    | ChAdOx1nCoV-19 vaccine |                   | BNT162b2 mRNA vaccine |                   | Positive SARS-CoV-2 test |                      |
|----------------------------------------------------|----------------|------------------------|-------------------|-----------------------|-------------------|--------------------------|----------------------|
|                                                    |                | events                 | IRR (99% CI)      | events                | IRR (99% CI)      | events                   | IRR (99% CI)         |
| <b>Composite primary outcomes</b>                  |                |                        |                   |                       |                   |                          |                      |
| <b>Thrombocytopenia + Venous thromboembolism</b>   | baseline       | 1761                   | 1.00              | 1755                  | 1.00              | 1927                     | 1.00                 |
|                                                    | -28 to -1 days | 261                    | 0.87 (0.74, 1.03) | 234                   | 0.93 (0.78, 1.10) | 123                      | 2.45 (1.83, 3.27)    |
|                                                    | 0 day          | *                      | 0.51 (0.19, 1.37) | 10                    | 1.22 (0.65, 2.31) | 39                       | 21.40 (14.47, 31.66) |
|                                                    | 1-7 days       | 63                     | 1.27 (0.95, 1.68) | 55                    | 0.99 (0.73, 1.34) | 63                       | 4.91 (3.50, 6.89)    |
|                                                    | 8-14 days      | 53                     | 1.34 (0.99, 1.83) | 56                    | 1.11 (0.82, 1.50) | 23                       | 1.91 (1.20, 3.06)    |
|                                                    | 15-21 days     | 25                     | 0.83 (0.54, 1.27) | 48                    | 1.13 (0.82, 1.56) | 12                       | 1.09 (0.60, 2.01)    |
|                                                    | 22-28 days     | 30                     | 1.38 (0.93, 2.06) | 39                    | 1.24 (0.87, 1.76) | 10                       | 0.98 (0.51, 1.90)    |
|                                                    |                |                        |                   |                       |                   |                          |                      |
| <b>Thrombocytopenia + Arterial thromboembolism</b> | baseline       | 1057                   | 1.00              | 1054                  | 1.00              | 1136                     | 1.00                 |
|                                                    | -28 to -1 days | 133                    | 0.83 (0.66, 1.02) | 122                   | 0.89 (0.71, 1.13) | 88                       | 3.32 (2.31, 4.76)    |
|                                                    | 0 day          | *                      | 0.89 (0.34, 2.40) | *                     | 0.46 (0.11, 1.84) | 20                       | 20.55 (12.07, 33.05) |
|                                                    | 1-7 days       | 29                     | 0.97 (0.65, 1.46) | 30                    | 1.00 (0.67, 1.49) | 25                       | 3.69 (2.29, 6.05)    |
|                                                    | 8-14 days      | 32                     | 1.28 (0.87, 1.90) | 39                    | 1.40 (0.97, 2.01) | 16                       | 2.59 (1.47, 4.62)    |
|                                                    | 15-21 days     | 21                     | 1.02 (0.64, 1.90) | 30                    | 1.27 (0.85, 1.91) | 8                        | 1.38 (0.65, 2.93)    |
|                                                    | 22-28 days     | 23                     | 1.43 (0.91, 2.25) | 22                    | 1.14 (0.72, 1.81) | 6                        | 1.13 (0.48, 2.64)    |

**Supplementary table 4a: Incidence rate ratios (IRR 95% CI) by age groups for primary composite and secondary outcomes in pre-defined risk periods immediately before and after exposure to vaccination and before and after a positive SARS-CoV-2 test result, adjusted for calendar time from December 1, 2020 to April 24, 2021**

|                                   | Time period    | ChAdOx1nCoV-19 vaccine |                   | BNT162b2 mRNA vaccine |                   | Positive SARS-CoV-2 test |                      |
|-----------------------------------|----------------|------------------------|-------------------|-----------------------|-------------------|--------------------------|----------------------|
|                                   |                | events                 | IRR (95% CI)      | events                | IRR (95% CI)      | events                   | IRR (95% CI)         |
| <b>Composite primary outcomes</b> |                |                        |                   |                       |                   |                          |                      |
| <b>Thrombocytopenia</b>           |                |                        |                   |                       |                   |                          |                      |
| <b>Age ≤ 50</b>                   | baseline       | 759                    | 1.00              | 256                   | 1.00              | 73                       | 1.00                 |
|                                   | -28 to -1 days | 194                    | 0.85 (0.71, 1.01) | 82                    | 0.91 (0.70, 1.17) | 50                       | 2.82 (1.92, 4.12)    |
|                                   | 0 day          | *                      | 0.40 (0.13, 1.25) | *                     | 1.23 (0.46, 3.34) | 28                       | 39.05 (24.87, 61.31) |
|                                   | 1-7 days       | 48                     | 0.96 (0.71, 1.30) | 20                    | 0.89 (0.56, 1.43) | 61                       | 11.78 (8.23, 16.84)  |
|                                   | 8-14 days      | 74                     | 1.56 (1.20, 2.02) | 21                    | 0.98 (0.62, 1.55) | 24                       | 4.53 (2.82, 7.27)    |
|                                   | 15-21 days     | 56                     | 1.28 (0.96, 1.71) | 27                    | 1.31 (0.87, 1.98) | 13                       | 2.34 (1.29, 4.25)    |
|                                   | 22-28 days     | 54                     | 1.40 (1.04, 1.88) | 27                    | 1.33 (0.88, 2.01) | 7                        | 1.25 (0.57, 2.72)    |
| <b>Age &gt; 50</b>                | baseline       | 3092                   | 1.00              | 1753                  | 1.00              | 308                      | 1.00                 |
|                                   | -28 to -1 days | 716                    | 0.63 (0.57, 0.68) | 422                   | 0.59 (0.52, 0.66) | 380                      | 5.15 (4.37, 6.06)    |
|                                   | 0 day          | 16                     | 0.39 (0.24, 0.64) | 9                     | 0.31 (0.16, 0.60) | 271                      | 83.58 (70.17, 99.56) |
|                                   | 1-7 days       | 283                    | 0.97 (0.85, 1.10) | 223                   | 1.02 (0.88, 1.19) | 337                      | 14.47 (12.26, 17.08) |
|                                   | 8-14 days      | 364                    | 1.27 (1.13, 1.43) | 233                   | 1.01 (0.88, 1.17) | 128                      | 5.41 (4.37, 6.69)    |
|                                   | 15-21 days     | 281                    | 1.04 (0.91, 1.18) | 232                   | 1.03 (0.89, 1.19) | 43                       | 1.80 (1.30, 2.49)    |
|                                   | 22-28 days     | 302                    | 1.22 (1.08, 1.39) | 214                   | 1.04 (0.89, 1.20) | 38                       | 1.55 (1.10, 2.17)    |
| <b>Venous thromboembolism</b>     |                |                        |                   |                       |                   |                          |                      |
| <b>Age ≤ 50</b>                   | baseline       | 1701                   | 1.00              | 585                   | 1.00              | 162                      | 1.00                 |
|                                   | -28 to -1 days | 416                    | 0.83 (0.73, 0.94) | 162                   | 0.67 (0.55, 0.80) | 98                       | 2.34 (1.79, 3.06)    |
|                                   | 0 day          | 6                      | 0.43 (0.19, 0.95) | *                     | 0.42 (0.14, 1.31) | 87                       | 47.64 (36.25, 62.61) |
|                                   | 1-7 days       | 67                     | 0.71 (0.55, 0.92) | 40                    | 0.79 (0.57, 1.10) | 202                      | 15.44 (12.38, 19.27) |
|                                   | 8-14 days      | 102                    | 1.19 (0.96, 1.48) | 40                    | 0.79 (0.57, 1.11) | 290                      | 21.24 (17.30, 26.08) |

|                                                |                |       |                   |       |                   |      |                      |
|------------------------------------------------|----------------|-------|-------------------|-------|-------------------|------|----------------------|
|                                                | 15-21 days     | 94    | 1.25 (0.99, 1.57) | 28    | 0.56 (0.38, 0.83) | 193  | 13.53 (10.88, 16.83) |
|                                                | 22-28 days     | 56    | 0.89 (0.67, 1.18) | 24    | 0.55 (0.36, 0.83) | 48   | 3.30 (2.38, 4.58)    |
| <b>Age &gt; 50</b>                             | baseline       | 8145  | 1.00              | 4042  | 1.00              | 1049 | 1.00                 |
|                                                | -28 to -1 days | 2145  | 0.68 (0.65, 0.72) | 1062  | 0.64 (0.59, 0.68) | 909  | 3.61 (3.28, 3.98)    |
|                                                | 0 day          | 47    | 0.47 (0.35, 0.62) | 22    | 0.34 (0.23, 0.52) | 746  | 65.97 (59.65, 72.96) |
|                                                | 1-7 days       | 679   | 0.95 (0.87, 1.03) | 446   | 0.94 (0.84, 1.04) | 1103 | 13.49 (12.31, 14.79) |
|                                                | 8-14 days      | 768   | 1.09 (1.01, 1.18) | 515   | 1.01 (0.92, 1.12) | 1081 | 12.68 (11.58, 13.89) |
|                                                | 15-21 days     | 669   | 1.01 (0.93, 1.10) | 486   | 0.94 (0.86, 1.04) | 614  | 6.97 (6.28, 7.73)    |
|                                                | 22-28 days     | 589   | 0.98 (0.90, 1.07) | 450   | 0.93 (0.84, 1.03) | 307  | 3.39 (2.98, 3.86)    |
| <b>Arterial thromboembolism</b>                |                |       |                   |       |                   |      |                      |
| <b>Age ≤ 50</b>                                | baseline       | 2316  | 1.00              | 800   | 1.00              | 190  | 1.00                 |
|                                                | -28 to -1 days | 703   | 0.93 (0.84, 1.03) | 251   | 0.79 (0.68, 0.91) | 112  | 2.29 (1.79, 2.94)    |
|                                                | 0 day          | 5     | 0.21 (0.09, 0.50) | *     | 0.17 (0.04, 0.70) | 62   | 32.05 (23.80, 43.16) |
|                                                | 1-7 days       | 110   | 0.67 (0.55, 0.82) | 45    | 0.57 (0.42, 0.77) | 81   | 5.74 (4.38, 7.52)    |
|                                                | 8-14 days      | 155   | 1.02 (0.86, 1.22) | 61    | 0.79 (0.60, 1.03) | 65   | 4.42 (3.31, 5.91)    |
|                                                | 15-21 days     | 133   | 1.00 (0.83, 1.21) | 65    | 0.86 (0.66, 1.12) | 33   | 2.22 (1.52, 3.23)    |
|                                                | 22-28 days     | 103   | 0.91 (0.74, 1.12) | 69    | 0.97 (0.75, 1.25) | 14   | 0.90 (0.52, 1.55)    |
| <b>Age &gt; 50</b>                             | baseline       | 29628 | 1.00              | 20347 | 1.00              | 2553 | 1.00                 |
|                                                | -28 to -1 days | 8452  | 0.77 (0.75, 0.80) | 5733  | 0.71 (0.69, 0.73) | 2942 | 4.77 (4.50, 5.05)    |
|                                                | 0 day          | 138   | 0.34 (0.29, 0.41) | 123   | 0.39 (0.32, 0.46) | 1103 | 43.01 (39.95, 46.31) |
|                                                | 1-7 days       | 2659  | 0.93 (0.90, 0.97) | 2116  | 0.93 (0.89, 0.98) | 1209 | 6.61 (6.16, 7.10)    |
|                                                | 8-14 days      | 2910  | 1.03 (0.99, 1.07) | 2316  | 0.99 (0.94, 1.03) | 852  | 4.53 (4.18, 4.90)    |
|                                                | 15-21 days     | 2773  | 1.02 (0.98, 1.06) | 2525  | 1.07 (1.02, 1.11) | 393  | 2.01 (1.80, 2.24)    |
|                                                | 22-28 days     | 2631  | 1.02 (0.98, 1.07) | 2152  | 0.95 (0.91, 1.00) | 264  | 1.29 (1.13, 1.46)    |
| <b>Secondary outcomes</b>                      |                |       |                   |       |                   |      |                      |
| <b>Cerebral venous sinus thrombosis (CVST)</b> |                |       |                   |       |                   |      |                      |
| <b>Age ≤ 50</b>                                | baseline       | 23    | 1.00              | 9     | 1.00              | *    | 1.00                 |

|                         |                |      |                    |      |                    |      |                      |
|-------------------------|----------------|------|--------------------|------|--------------------|------|----------------------|
|                         | -28 to -1 days | *    | 0.56 (0.18, 1.74)  | *    | 0.87 (0.23, 3.30)  | *    | n/a                  |
|                         | 0 day          | *    | n/a                | *    | n/a                | *    | n/a                  |
|                         | 1-7 days       | *    | n/a                | *    | n/a                | *    | n/a                  |
|                         | 8-14 days      | 11   | 6.36 (2.61, 15.46) | *    | 1.40 (0.17, 11.79) | *    | n/a                  |
|                         | 15-21 days     | *    | 1.92 (0.51, 7.19)  | *    | 3.90 (0.96, 15.82) | *    | n/a                  |
|                         | 22-28 days     | *    | 0.73 (0.09, 5.85)  | *    | n/a                | *    | n/a                  |
| <b>Age &gt; 50</b>      | baseline       | 21   | 1.00               | 12   | 1.00               | *    | 1.00                 |
|                         | -28 to -1 days | 5    | 0.80 (0.27, 2.36)  | *    | 1.22 (0.37, 4.09)  | *    | n/a                  |
|                         | 0 day          | *    | 4.63 (0.58, 36.74) | *    | n/a                | *    | n/a                  |
|                         | 1-7 days       | *    | 1.19 (0.25, 5.53)  | *    | n/a                | *    | n/a                  |
|                         | 8-14 days      | *    | 2.54 (0.78, 8.25)  | *    | 3.43 (0.89, 13.18) | *    | n/a                  |
|                         | 15-21 days     | 5    | 2.74 (0.92, 8.18)  | *    | 3.23 (0.85, 12.27) | *    | n/a                  |
|                         | 22-28 days     | *    | 0.58 (0.07, 4.53)  | *    | n/a                | *    | n/a                  |
| <b>Ischaemic stroke</b> |                |      |                    |      |                    |      |                      |
| <b>Age ≤ 50</b>         | baseline       | 692  | 1.00               | 223  | 1.00               | 57   | 1.00                 |
|                         | -28 to -1 days | 205  | 0.90 (0.75, 1.08)  | 53   | 0.59 (0.44, 0.81)  | 41   | 2.80 (1.82, 4.32)    |
|                         | 0 day          | 1    | 0.13 (0.02, 0.96)  | 2    | 0.67 (0.16, 2.70)  | 23   | 38.34 (23.10, 63.63) |
|                         | 1-7 days       | 26   | 0.52 (0.34, 0.78)  | 14   | 0.63 (0.36, 1.10)  | 20   | 4.55 (2.69, 7.71)    |
|                         | 8-14 days      | 45   | 0.99 (0.72, 1.37)  | 16   | 0.72 (0.43, 1.21)  | 17   | 3.77 (2.16, 6.58)    |
|                         | 15-21 days     | 39   | 0.99 (0.70, 1.40)  | 18   | 0.80 (0.49, 1.32)  | 12   | 2.60 (1.38, 4.91)    |
|                         | 22-28 days     | 35   | 1.06 (0.74, 1.53)  | 19   | 0.92 (0.57, 1.50)  | 7    | 1.46 (0.66, 3.21)    |
| <b>Age &gt; 50</b>      | baseline       | 9663 | 1.00               | 6216 | 1.00               | 1012 | 1.00                 |
|                         | -28 to -1 days | 2466 | 0.66 (0.63, 0.69)  | 1561 | 0.62 (0.58, 0.66)  | 1087 | 4.28 (3.90, 4.70)    |
|                         | 0 day          | 42   | 0.30 (0.22, 0.41)  | 31   | 0.31 (0.22, 0.44)  | 250  | 22.69 (19.67, 26.18) |
|                         | 1-7 days       | 942  | 0.96 (0.90, 1.03)  | 704  | 0.98 (0.90, 1.06)  | 306  | 3.89 (3.41, 4.44)    |
|                         | 8-14 days      | 1035 | 1.08 (1.01, 1.15)  | 773  | 1.04 (0.96, 1.12)  | 258  | 3.21 (2.79, 3.70)    |
|                         | 15-21 days     | 926  | 1.00 (0.93, 1.08)  | 844  | 1.13 (1.05, 1.22)  | 162  | 1.97 (1.66, 2.33)    |
|                         | 22-28 days     | 885  | 1.02 (0.95, 1.10)  | 746  | 1.04 (0.96, 1.12)  | 105  | 1.25 (1.02, 1.53)    |

|                                       |                |       |                   |       |                   |      |                      |
|---------------------------------------|----------------|-------|-------------------|-------|-------------------|------|----------------------|
| <b>Myocardial infarction</b>          |                |       |                   |       |                   |      |                      |
| <b>Age ≤ 50</b>                       | baseline       | 1555  | 1.00              | 561   | 1.00              | 125  | 1.00                 |
|                                       | -28 to -1 days | 486   | 0.96 (0.85, 1.08) | 196   | 0.88 (0.74, 1.04) | 76   | 2.41 (1.78, 3.27)    |
|                                       | 0 day          | *     | 0.25 (0.09, 0.66) | 0     | n/a               | 37   | 29.99 (20.50, 43.86) |
|                                       | 1-7 days       | 84    | 0.77 (0.61, 0.97) | 31    | 0.56 (0.39, 0.81) | 56   | 6.24 (4.49, 8.67)    |
|                                       | 8-14 days      | 106   | 1.04 (0.84, 1.28) | 45    | 0.84 (0.62, 1.16) | 45   | 4.77 (3.36, 6.78)    |
|                                       | 15-21 days     | 88    | 0.97 (0.77, 1.22) | 45    | 0.88 (0.64, 1.20) | 21   | 2.19 (1.37, 3.50)    |
|                                       | 22-28 days     | 66    | 0.85 (0.66, 1.11) | 49    | 1.01 (0.75, 1.37) | 7    | 0.69 (0.32, 1.49)    |
| <b>Age &gt; 50</b>                    | baseline       | 20524 | 1.00              | 14563 | 1.00              | 1651 | 1.00                 |
|                                       | -28 to -1 days | 6079  | 0.83 (0.80, 0.85) | 4289  | 0.75 (0.73, 0.78) | 1919 | 4.92 (4.58, 5.29)    |
|                                       | 0 day          | 99    | 0.37 (0.30, 0.45) | 95    | 0.43 (0.35, 0.52) | 869  | 54.86 (50.31, 59.83) |
|                                       | 1-7 days       | 1797  | 0.93 (0.89, 0.98) | 1452  | 0.92 (0.87, 0.97) | 914  | 8.09 (7.43, 8.81)    |
|                                       | 8-14 days      | 1922  | 1.00 (0.95, 1.05) | 1623  | 0.99 (0.94, 1.04) | 579  | 4.96 (4.49, 5.46)    |
|                                       | 15-21 days     | 1912  | 1.02 (0.98, 1.08) | 1744  | 1.05 (1.00, 1.10) | 237  | 1.93 (1.68, 2.22)    |
|                                       | 22-28 days     | 1823  | 1.03 (0.98, 1.08) | 1461  | 0.92 (0.87, 0.98) | 154  | 1.18 (1.00, 1.40)    |
| <b>Other rare arterial thrombosis</b> |                |       |                   |       |                   |      |                      |
| <b>Age ≤ 50</b>                       | baseline       | 125   | 1.00              | 41    | 1.00              | 12   | 1.00                 |
|                                       | -28 to -1 days | 30    | 0.80 (0.51, 1.27) | 8     | 0.47 (0.21, 1.04) | *    | 0.46 (0.10, 2.10)    |
|                                       | 0 day          | *     | n/a               | *     | n/a               | *    | 19.21 (5.23, 70.50)  |
|                                       | 1-7 days       | 6     | 0.79 (0.33, 1.89) | *     | 0.28 (0.04, 2.04) | 8    | 7.09 (2.79, 17.99)   |
|                                       | 8-14 days      | 8     | 1.19 (0.54, 2.60) | *     | 0.52 (0.12, 2.22) | 5    | 4.29 (1.47, 12.55)   |
|                                       | 15-21 days     | 7     | 1.24 (0.54, 2.85) | *     | 0.98 (0.34, 2.83) | *    | n/a                  |
|                                       | 22-28 days     | 5     | 1.02 (0.39, 2.68) | *     | 0.51 (0.12, 2.17) | *    | 0.95 (0.12, 7.34)    |
| <b>Age &gt; 50</b>                    | baseline       | 1344  | 1.00              | 691   | 1.00              | 127  | 1.00                 |
|                                       | -28 to -1 days | 335   | 0.62 (0.54, 0.70) | 175   | 0.60 (0.50, 0.72) | 162  | 5.27 (4.08, 6.79)    |
|                                       | 0 day          | 5     | 0.26 (0.11, 0.62) | *     | 0.08 (0.01, 0.59) | 52   | 37.12 (26.52, 51.97) |
|                                       | 1-7 days       | 99    | 0.73 (0.59, 0.91) | 92    | 1.07 (0.85, 1.34) | 52   | 5.18 (3.70, 7.25)    |

|  |            |     |                   |     |                   |    |                   |
|--|------------|-----|-------------------|-----|-------------------|----|-------------------|
|  | 8-14 days  | 156 | 1.20 (1.01, 1.44) | 86  | 0.96 (0.76, 1.21) | 60 | 5.77 (4.19, 7.93) |
|  | 15-21 days | 120 | 0.98 (0.81, 1.20) | 103 | 1.17 (0.94, 1.45) | 34 | 3.30 (2.24, 4.86) |
|  | 22-28 days | 109 | 0.99 (0.80, 1.21) | 100 | 1.17 (0.95, 1.46) | 30 | 2.84 (1.90, 4.25) |

**Supplementary table 4b: Incidence rate ratios (IRR 95% CI) by sex for primary composite and secondary outcomes in pre-defined risk periods immediately before and after exposure to vaccination and before and after a positive SARS-CoV-2 test result, adjusted for calendar time from December 1, 2020 to April 24, 2021.**

|                                   | Time period    | ChAdOx1nCoV-19 vaccine |                   | BNT162b2 mRNA vaccine |                   | Positive SARS-CoV-2 test |                       |
|-----------------------------------|----------------|------------------------|-------------------|-----------------------|-------------------|--------------------------|-----------------------|
|                                   |                | events                 | IRR (95% CI)      | events                | IRR (95% CI)      | events                   | IRR (95% CI)          |
| <b>Composite primary outcomes</b> |                |                        |                   |                       |                   |                          |                       |
| <b>Thrombocytopenia</b>           |                |                        |                   |                       |                   |                          |                       |
| <b>Female</b>                     | baseline       | 1832                   | 1.00              | 899                   | 1.00              | 190                      | 1.00                  |
|                                   | -28 to -1 days | 420                    | 0.64 (0.57, 0.72) | 246                   | 0.69 (0.59, 0.80) | 198                      | 4.37 (3.52, 5.43)     |
|                                   | 0 day          | 7                      | 0.30 (0.14, 0.64) | 5                     | 0.37 (0.15, 0.89) | 117                      | 60.51 (47.37, 77.28)  |
|                                   | 1-7 days       | 156                    | 0.97 (0.81, 1.15) | 109                   | 1.09 (0.88, 1.34) | 154                      | 11.22 (8.95, 14.07)   |
|                                   | 8-14 days      | 221                    | 1.40 (1.21, 1.63) | 103                   | 0.98 (0.79, 1.21) | 61                       | 4.41 (3.28, 5.94)     |
|                                   | 15-21 days     | 159                    | 1.07 (0.91, 1.28) | 116                   | 1.12 (0.91, 1.36) | 24                       | 1.72 (1.12, 2.64)     |
|                                   | 22-28 days     | 165                    | 1.22 (1.03, 1.44) | 106                   | 1.09 (0.89, 1.35) | 19                       | 1.32 (0.82, 2.12)     |
| <b>Male</b>                       | baseline       | 2019                   | 1.00              | 1110                  | 1.00              | 191                      | 1.00                  |
|                                   | -28 to -1 days | 490                    | 0.69 (0.62, 0.76) | 258                   | 0.58 (0.50, 0.67) | 232                      | 5.06 (4.12, 6.23)     |
|                                   | 0 day          | 12                     | 0.47 (0.27, 0.84) | 8                     | 0.43 (0.21, 0.87) | 182                      | 90.64 (73.01, 112.54) |
|                                   | 1-7 days       | 175                    | 0.98 (0.83, 1.16) | 134                   | 0.97 (0.80, 1.18) | 244                      | 16.75 (13.68, 20.51)  |
|                                   | 8-14 days      | 217                    | 1.26 (1.08, 1.46) | 151                   | 1.05 (0.88, 1.26) | 91                       | 6.08 (4.69, 7.86)     |
|                                   | 15-21 days     | 178                    | 1.09 (0.93, 1.29) | 143                   | 1.02 (0.85, 1.23) | 32                       | 2.09 (1.43, 3.05)     |
|                                   | 22-28 days     | 191                    | 1.30 (1.11, 1.53) | 135                   | 1.06 (0.88, 1.28) | 26                       | 1.68 (1.11, 2.53)     |



|                                 |                |       |                   |       |                   |      |                      |
|---------------------------------|----------------|-------|-------------------|-------|-------------------|------|----------------------|
| <b>Venous thromboembolism</b>   |                |       |                   |       |                   |      |                      |
| <b>Female</b>                   | baseline       | 4562  | 1.00              | 2299  | 1.00              | 620  | 1.00                 |
|                                 | -28 to -1 days | 1176  | 0.67 (0.62, 0.72) | 576   | 0.61 (0.55, 0.67) | 491  | 3.33 (2.93, 3.79)    |
|                                 | 0 day          | 27    | 0.47 (0.32, 0.68) | 12    | 0.33 (0.19, 0.58) | 333  | 50.55 (43.87, 58.24) |
|                                 | 1-7 days       | 380   | 0.93 (0.83, 1.04) | 244   | 0.91 (0.80, 1.05) | 508  | 10.69 (9.43, 12.13)  |
|                                 | 8-14 days      | 466   | 1.17 (1.05, 1.29) | 278   | 0.98 (0.86, 1.12) | 495  | 10.02 (8.84, 11.36)  |
|                                 | 15-21 days     | 380   | 1.02 (0.91, 1.14) | 271   | 0.96 (0.84, 1.09) | 297  | 5.83 (5.05, 6.73)    |
|                                 | 22-28 days     | 352   | 1.04 (0.93, 1.17) | 236   | 0.88 (0.77, 1.01) | 162  | 3.10 (2.60, 3.70)    |
| <b>Male</b>                     | baseline       | 5279  | 1.00              | 2324  | 1.00              | 591  | 1.00                 |
|                                 | -28 to -1 days | 1385  | 0.72 (0.68, 0.77) | 648   | 0.66 (0.60, 0.73) | 516  | 3.54 (3.11, 4.02)    |
|                                 | 0 day          | 26    | 0.45 (0.31, 0.67) | 13    | 0.37 (0.22, 0.64) | 500  | 76.51 (67.35, 86.92) |
|                                 | 1-7 days       | 362   | 0.90 (0.81, 1.01) | 241   | 0.92 (0.80, 1.06) | 797  | 16.85 (15.02, 18.90) |
|                                 | 8-14 days      | 403   | 1.04 (0.93, 1.16) | 277   | 1.00 (0.88, 1.14) | 876  | 17.67 (15.80, 19.76) |
|                                 | 15-21 days     | 382   | 1.06 (0.95, 1.18) | 243   | 0.86 (0.75, 0.99) | 510  | 9.89 (8.74, 11.19)   |
|                                 | 22-28 days     | 289   | 0.90 (0.79, 1.02) | 237   | 0.91 (0.79, 1.04) | 193  | 3.65 (3.10, 4.31)    |
| <b>Arterial thromboembolism</b> |                |       |                   |       |                   |      |                      |
| <b>Female</b>                   | baseline       | 12340 | 1.00              | 8104  | 1.00              | 1162 | 1.00                 |
|                                 | -28 to -1 days | 3247  | 0.70 (0.67, 0.73) | 2141  | 0.65 (0.62, 0.69) | 1281 | 4.37 (4.01, 4.77)    |
|                                 | 0 day          | 66    | 0.38 (0.30, 0.49) | 42    | 0.32 (0.24, 0.43) | 424  | 34.28 (30.53, 38.49) |
|                                 | 1-7 days       | 1089  | 0.89 (0.83, 0.95) | 860   | 0.92 (0.86, 1.00) | 433  | 4.90 (4.37, 5.50)    |
|                                 | 8-14 days      | 1201  | 0.98 (0.93, 1.05) | 899   | 0.94 (0.87, 1.01) | 272  | 3.02 (2.64, 3.46)    |
|                                 | 15-21 days     | 1134  | 0.97 (0.91, 1.03) | 1017  | 1.05 (0.98, 1.12) | 166  | 1.79 (1.52, 2.11)    |
|                                 | 22-28 days     | 1073  | 0.97 (0.91, 1.04) | 901   | 0.97 (0.91, 1.05) | 123  | 1.28 (1.06, 1.54)    |
| <b>Male</b>                     | baseline       | 19594 | 1.00              | 13031 | 1.00              | 1581 | 1.00                 |
|                                 | -28 to -1 days | 5903  | 0.83 (0.81, 0.86) | 3842  | 0.75 (0.72, 0.78) | 1773 | 4.73 (4.40, 5.09)    |
|                                 | 0 day          | 77    | 0.30 (0.24, 0.38) | 83    | 0.41 (0.33, 0.52) | 741  | 48.24 (44.02, 52.86) |

|                                                  |                |      |                   |      |                   |     |                      |
|--------------------------------------------------|----------------|------|-------------------|------|-------------------|-----|----------------------|
|                                                  | 1-7 days       | 1675 | 0.93 (0.88, 0.98) | 1301 | 0.91 (0.86, 0.97) | 857 | 7.81 (7.16, 8.52)    |
|                                                  | 8-14 days      | 1861 | 1.05 (1.00, 1.10) | 1477 | 1.00 (0.95, 1.06) | 645 | 5.67 (5.16, 6.23)    |
|                                                  | 15-21 days     | 1771 | 1.04 (0.99, 1.09) | 1572 | 1.06 (1.00, 1.12) | 260 | 2.19 (1.91, 2.50)    |
|                                                  | 22-28 days     | 1660 | 1.04 (0.99, 1.10) | 1317 | 0.93 (0.88, 0.99) | 155 | 1.24 (1.05, 1.46)    |
| <b>Secondary outcomes</b>                        |                |      |                   |      |                   |     |                      |
| <b>Cerebral venous sinus thrombosis (CVST) *</b> |                |      |                   |      |                   |     |                      |
| <b>Ischaemic stroke</b>                          |                |      |                   |      |                   |     |                      |
| <b>Female</b>                                    | baseline       | 5091 | 1.00              | 3171 | 1.00              | 550 | 1.00                 |
|                                                  | -28 to -1 days | 1259 | 0.64 (0.60, 0.68) | 779  | 0.60 (0.55, 0.65) | 555 | 4.06 (3.57, 4.63)    |
|                                                  | 0 day          | 19   | 0.26 (0.17, 0.41) | 11   | 0.21 (0.12, 0.38) | 121 | 20.43 (16.67, 25.04) |
|                                                  | 1-7 days       | 500  | 0.98 (0.89, 1.08) | 369  | 0.99 (0.89, 1.11) | 149 | 3.51 (2.91, 4.23)    |
|                                                  | 8-14 days      | 528  | 1.05 (0.96, 1.16) | 376  | 0.99 (0.89, 1.11) | 106 | 2.45 (1.98, 3.03)    |
|                                                  | 15-21 days     | 485  | 1.01 (0.91, 1.11) | 444  | 1.16 (1.05, 1.29) | 84  | 1.90 (1.51, 2.40)    |
|                                                  | 22-28 days     | 465  | 1.03 (0.93, 1.13) | 386  | 1.05 (0.95, 1.18) | 55  | 1.21 (0.92, 1.60)    |
| <b>Male</b>                                      | baseline       | 5264 | 1.00              | 3268 | 1.00              | 519 | 1.00                 |
|                                                  | -28 to -1 days | 1411 | 0.70 (0.65, 0.74) | 835  | 0.63 (0.59, 0.69) | 573 | 4.34 (3.82, 4.94)    |
|                                                  | 0 day          | 24   | 0.33 (0.22, 0.49) | 22   | 0.42 (0.28, 0.64) | 152 | 26.67 (22.13, 32.14) |
|                                                  | 1-7 days       | 468  | 0.90 (0.81, 0.99) | 349  | 0.93 (0.83, 1.04) | 177 | 4.36 (3.66, 5.20)    |
|                                                  | 8-14 days      | 552  | 1.09 (0.99, 1.19) | 413  | 1.06 (0.95, 1.17) | 169 | 4.06 (3.40, 4.85)    |
|                                                  | 15-21 days     | 480  | 0.99 (0.90, 1.10) | 418  | 1.06 (0.96, 1.18) | 90  | 2.10 (1.67, 2.63)    |
|                                                  | 22-28 days     | 455  | 1.02 (0.92, 1.12) | 377  | 1.00 (0.90, 1.12) | 57  | 1.31 (1.00, 1.73)    |
| <b>Myocardial infarction</b>                     |                |      |                   |      |                   |     |                      |
| <b>Female</b>                                    | baseline       | 7456 | 1.00              | 5104 | 1.00              | 660 | 1.00                 |
|                                                  | -28 to -1 days | 2020 | 0.73 (0.69, 0.77) | 1393 | 0.69 (0.64, 0.73) | 747 | 4.47 (3.99, 5.01)    |
|                                                  | 0 day          | 45   | 0.44 (0.32, 0.58) | 33   | 0.41 (0.29, 0.58) | 311 | 45.07 (39.13, 51.90) |
|                                                  | 1-7 days       | 625  | 0.85 (0.78, 0.92) | 499  | 0.87 (0.79, 0.96) | 287 | 5.84 (5.06, 6.75)    |
|                                                  | 8-14 days      | 689  | 0.93 (0.86, 1.01) | 553  | 0.93 (0.84, 1.01) | 159 | 3.17 (2.65, 3.78)    |

|                |                                       |          |                   |       |                   |      |                      |
|----------------|---------------------------------------|----------|-------------------|-------|-------------------|------|----------------------|
|                | 15-21 days                            | 671      | 0.94 (0.87, 1.02) | 594   | 0.98 (0.89, 1.07) | 85   | 1.62 (1.29, 2.04)    |
|                | 22-28 days                            | 624      | 0.92 (0.85, 1.01) | 532   | 0.92 (0.84, 1.01) | 66   | 1.21 (0.94, 1.56)    |
| <b>Male</b>    | baseline                              | 14613    | 1.00              | 10008 | 1.00              | 1116 | 1.00                 |
|                | -28 to -1 days                        | 4541     | 0.88 (0.85, 0.91) | 3091  | 0.79 (0.76, 0.83) | 1248 | 4.89 (4.47, 5.34)    |
|                | 0 day                                 | 58       | 0.31 (0.24, 0.40) | 62    | 0.41 (0.32, 0.53) | 595  | 57.89 (52.11, 64.31) |
|                | 1-7 days                              | 1251     | 0.95 (0.90, 1.01) | 984   | 0.92 (0.86, 0.98) | 683  | 9.29 (8.40, 10.27)   |
|                | 8-14 days                             | 1336     | 1.02 (0.97, 1.09) | 1114  | 1.01 (0.94, 1.07) | 465  | 6.07 (5.42, 6.79)    |
|                | 15-21 days                            | 1328     | 1.06 (1.00, 1.12) | 1194  | 1.07 (1.00, 1.14) | 173  | 2.14 (1.82, 2.52)    |
|                | 22-28 days                            | 1264     | 1.07 (1.01, 1.13) | 976   | 0.92 (0.86, 0.98) | 95   | 1.10 (0.89, 1.36)    |
|                | <b>Other rare arterial thrombosis</b> |          |                   |       |                   |      |                      |
| <b>Female</b>  | baseline                              | 559      | 1.00              | 282   | 1.00              | 50   | 1.00                 |
|                | -28 to -1 days                        | 139      | 0.61 (0.50, 0.74) | 70    | 0.59 (0.45, 0.78) | 53   | 4.31 (2.83, 6.56)    |
|                | 0 day                                 | *        | 0.25 (0.06, 0.99) | 0     | n/a               | 19   | 33.69 (19.46, 58.34) |
|                | 1-7 days                              | 37       | 0.64 (0.46, 0.91) | 43    | 1.20 (0.85, 1.68) | 24   | 5.95 (3.58, 9.89)    |
|                | 8-14 days                             | 66       | 1.18 (0.90, 1.56) | 33    | 0.89 (0.61, 1.29) | 20   | 4.75 (2.78, 8.12)    |
|                | 15-21 days                            | 50       | 0.96 (0.71, 1.30) | 38    | 1.04 (0.73, 1.48) | 11   | 2.67 (1.37, 5.19)    |
|                | 22-28 days                            | 57       | 1.20 (0.90, 1.60) | 32    | 0.92 (0.63, 1.33) | 12   | 2.83 (1.49, 5.35)    |
|                | <b>Male</b>                           | baseline | 910               | 1.00  | 450               | 1.00 | 89                   |
| -28 to -1 days |                                       | 226      | 0.64 (0.55, 0.75) | 113   | 0.59 (0.47, 0.73) | 111  | 4.94 (3.65, 6.70)    |
| 0 day          |                                       | *        | 0.25 (0.08, 0.77) | *     | 0.13 (0.02, 0.92) | 36   | 36.02 (24.06, 53.93) |
| 1-7 days       |                                       | 68       | 0.80 (0.62, 1.04) | 50    | 0.91 (0.68, 1.24) | 36   | 5.00 (3.35, 7.47)    |
| 8-14 days      |                                       | 98       | 1.22 (0.98, 1.53) | 55    | 0.99 (0.74, 1.32) | 45   | 6.08 (4.19, 8.82)    |
| 15-21 days     |                                       | 77       | 1.03 (0.81, 1.32) | 69    | 1.25 (0.96, 1.62) | 23   | 3.14 (1.97, 5.02)    |
| 22-28 days     |                                       | 57       | 0.85 (0.65, 1.13) | 70    | 1.31 (1.01, 1.70) | 19   | 2.55 (1.55, 4.21)    |

\* Model does not converge

**Supplementary Table 5: Incidence rate ratios (IRR 95% CI) for celiac disease (negative control) and anaphylaxis (positive control) in pre-defined risk periods immediately before and after exposure to vaccination and before and after a positive SARS-CoV-2 result, adjusted for calendar time from December 1, 2020 to April 24, 2021**

|                               |                | Celiac disease (negative control) |                      | Anaphylaxis (positive control) |                      |
|-------------------------------|----------------|-----------------------------------|----------------------|--------------------------------|----------------------|
|                               |                | events                            | IRR (95% CI)         | events                         | IRR (95% CI)         |
| Group                         | Time period    |                                   |                      |                                |                      |
| <b>ChAdOx1nCoV-19 vaccine</b> | baseline       | 2072                              | 1.00                 | 339                            | 1.00                 |
|                               | -28 to -1 days | 688                               | 0.95 (0.87, 1.05)    | 105                            | 0.87 (0.69, 1.10)    |
|                               | 0 day          | *                                 | 0.08 (0.02, 0.31)    | 45                             | 10.71 (7.72, 14.85)  |
|                               | 1-7 days       | 157                               | 0.88 (0.74, 1.04)    | 49                             | 1.71 (1.24, 2.35)    |
|                               | 8-14 days      | 180                               | 1.03 (0.88, 1.21)    | 23                             | 0.83 (0.53, 1.28)    |
|                               | 15-21 days     | 158                               | 0.96 (0.81, 1.14)    | 28                             | 1.04 (0.70, 1.56)    |
|                               | 22-28 days     | <155                              | 1.00 (0.84, 1.19)    | 23                             | 0.96 (0.62, 1.48)    |
| <b>BNT162b2 mRNA vaccine</b>  | baseline       | 1280                              | 1.00                 | 110                            | 1.00                 |
|                               | -28 to -1 days | 428                               | 0.88 (0.78, 0.98)    | 30                             | 0.73 (0.48, 1.11)    |
|                               | 0 day          | 4                                 | 0.22 (0.08, 0.58)    | 29                             | 18.87 (12.37, 28.78) |
|                               | 1-7 days       | 95                                | 0.74 (0.60, 0.92)    | 16                             | 1.48 (0.87, 2.53)    |
|                               | 8-14 days      | 121                               | 0.93 (0.77, 1.13)    | 21                             | 1.89 (1.17, 3.05)    |
|                               | 15-21 days     | 118                               | 0.90 (0.74, 1.09)    | 12                             | 1.11 (0.61, 2.04)    |
|                               | 22-28 days     | 107                               | 0.85 (0.69, 1.04)    | 10                             | 0.93 (0.48, 1.78)    |
| <b>SARS-CoV-2</b>             | baseline       | 173                               | 1.00                 | 43                             | 1.00                 |
|                               | -28 to -1 days | 83                                | 1.98 (1.50, 2.61)    | 14                             | 1.55 (0.81, 2.97)    |
|                               | 0 day          | 41                                | 25.94 (18.26, 36.84) | 9                              | 25.82 (12.16, 54.80) |
|                               | 1-7 days       | 66                                | 5.85 (4.36, 7.86)    | 8                              | 3.23 (1.48, 7.06)    |
|                               | 8-14 days      | 51                                | 4.29 (3.11, 5.92)    | *                              | 0.41 (0.06, 2.97)    |
|                               | 15-21 days     | 15                                | 1.19 (0.70, 2.03)    | *                              | 0.38 (0.05, 2.77)    |
|                               | 22-28 days     | 19                                | 1.40 (0.87, 2.25)    | 5                              | 1.73 (0.68, 4.43)    |

**Supplementary table 6a: Background crude incidence rates per 100,000 person years (95% CI) of primary outcomes in people aged 16+ for the 5 calendar years 2015-2019 using primary care data from the QResearch database (representative 20% sample of England) linked to hospital and mortality records**

|        | Thrombocytopenia |                   |                           | Venous thromboembolism |                   |                           | Arterial thromboembolism |                   |                              |
|--------|------------------|-------------------|---------------------------|------------------------|-------------------|---------------------------|--------------------------|-------------------|------------------------------|
|        | count            | pyrs<br>(100,000) | Rate (95% CI)             | count                  | Pyrs<br>(100,000) | Rate (95% CI)             | count                    | Pyrs<br>(100,000) | Rate (95% CI)                |
| total  | 16478            | 440,71            | 37.39 (36.82 to 37.97)    | 80444                  | 435,03            | 184.92 (183.64 to 186.20) | 145075                   | 430,12            | 337.29 (335.56 to 339.03)    |
| Sex    |                  |                   |                           |                        |                   |                           |                          |                   |                              |
| female | 7308             | 221,23            | 33.03 (32.28 to 33.80)    | 42615                  | 218,00            | 195.48 (193.63 to 197.34) | 63576                    | 217,71            | 292.02 (289.76 to 294.30)    |
| male   | 9170             | 219,48            | 41.78 (40.93 to 42.65)    | 37829                  | 217,02            | 174.31 (172.56 to 176.07) | 81499                    | 212,41            | 383.69 (381.07 to 386.33)    |
| Age    |                  |                   |                           |                        |                   |                           |                          |                   |                              |
| 16-19  | 272              | 24,04             | 11.31 (10.05 to 12.74)    | 540                    | 24,06             | 22.44 (20.63 to 24.42)    | 62                       | 24,08             | 2.58 (2.01 to 3.30)          |
| 20-24  | 507              | 37,54             | 13.50 (12.38 to 14.73)    | 1393                   | 37,54             | 37.11 (35.21 to 39.11)    | 210                      | 37,60             | 5.59 (4.88 to 6.39)          |
| 25-29  | 717              | 43,69             | 16.41 (15.25 to 17.66)    | 2168                   | 43,62             | 49.70 (47.65 to 51.84)    | 433                      | 43,75             | 9.90 (9.01 to 10.87)         |
| 30-34  | 788              | 43,23             | 18.23 (17.00 to 19.54)    | 2781                   | 43,11             | 64.52 (62.16 to 66.96)    | 898                      | 43,29             | 20.74 (19.43 to 22.14)       |
| 35-39  | 801              | 39,34             | 20.36 (19.00 to 21.82)    | 2948                   | 39,15             | 75.31 (72.64 to 78.07)    | 1704                     | 39,37             | 43.28 (41.28 to 45.39)       |
| 40-44  | 851              | 37,26             | 22.84 (21.35 to 24.42)    | 3663                   | 36,99             | 99.02 (95.87 to 102.28)   | 3398                     | 37,20             | 91.36 (88.34 to 94.48)       |
| 45-49  | 1011             | 38,71             | 26.12 (24.56 to 27.78)    | 4902                   | 38,30             | 127.98 (124.45 to 131.61) | 6744                     | 38,42             | 175.53 (171.39 to 179.76)    |
| 50-54  | 1219             | 37,28             | 32.70 (30.92 to 34.59)    | 5911                   | 36,80             | 160.61 (156.56 to 164.75) | 9803                     | 36,69             | 267.19 (261.96 to 272.53)    |
| 55-59  | 1363             | 31,65             | 43.07 (40.84 to 45.42)    | 6118                   | 31,16             | 196.33 (191.47 to 201.31) | 11861                    | 30,76             | 385.66 (378.78 to 392.66)    |
| 60-64  | 1464             | 26,45             | 55.34 (52.58 to 58.25)    | 6996                   | 25,92             | 269.87 (263.62 to 276.27) | 12934                    | 25,34             | 510.51 (501.79 to 519.38)    |
| 65-69  | 1754             | 26,20             | 66.95 (63.89 to 70.15)    | 9225                   | 25,51             | 361.57 (354.27 to 369.03) | 16167                    | 24,68             | 655.08 (645.05 to 665.25)    |
| 70-74  | 1671             | 19,86             | 84.15 (80.21 to 88.29)    | 8925                   | 19,18             | 465.22 (455.67 to 474.97) | 16807                    | 18,26             | 920.27 (906.46 to 934.29)    |
| 75-79  | 1644             | 15,09             | 108.93 (103.79 to 114.32) | 8718                   | 14,45             | 603.46 (590.93 to 616.26) | 18461                    | 13,44             | 1373.57 (1353.90 to 1393.53) |
| 80-84  | 1297             | 10,70             | 121.26 (114.84 to 128.04) | 7647                   | 10,15             | 753.62 (736.92 to 770.70) | 18881                    | 9,21              | 2049.25 (2020.23 to 2078.69) |

|                             |       |        |                           |       |        |                             |        |        |                              |
|-----------------------------|-------|--------|---------------------------|-------|--------|-----------------------------|--------|--------|------------------------------|
| 85-89                       | 746   | 6,30   | 118.32 (110.13 to 127.13) | 5402  | 5,92   | 912.08 (888.08 to 936.73)   | 15394  | 5,28   | 2917.83 (2872.10 to 2964.29) |
| 90-94                       | 307   | 2,64   | 116.37 (104.05 to 130.14) | 2472  | 2,47   | 1001.90 (963.17 to 1042.18) | 8578   | 2,17   | 3956.02 (3873.18 to 4040.63) |
| 95+                         | 56    | 0,64   | 87.33 (67.21 to 113.48)   | 581   | 0,60   | 967.91 (892.32 to 1049.90)  | 2417   | 0,52   | 4610.73 (4430.53 to 4798.25) |
|                             |       |        |                           |       |        |                             |        |        |                              |
| Ethnicity                   |       |        |                           |       |        |                             |        |        |                              |
| White                       | 11022 | 273,4  | 40.31 (39.57 to 41.07)    | 57084 | 269,14 | 212.10 (210.37 to 213.85)   | 100015 | 265,73 | 376.38 (374.06 to 378.72)    |
| Indian                      | 410   | 11,65  | 35.19 (31.95 to 38.77)    | 1084  | 11,58  | 93.58 (88.17 to 99.32)      | 2819   | 11,44  | 246.32 (237.39 to 255.58)    |
| Pakistani                   | 282   | 8,08   | 34.91 (31.07 to 39.23)    | 748   | 8,05   | 92.96 (86.53 to 99.87)      | 2335   | 7,89   | 295.76 (284.01 to 308.01)    |
| Bangladeshi                 | 197   | 5,60   | 35.18 (30.59 to 40.45)    | 344   | 5,60   | 61.47 (55.30 to 68.32)      | 1298   | 5,51   | 235.65 (223.17 to 248.83)    |
| Other Asian                 | 230   | 7,61   | 30.22 (26.56 to 34.39)    | 469   | 7,60   | 61.75 (56.41 to 67.60)      | 1191   | 7,53   | 158.15 (149.42 to 167.39)    |
| Caribbean                   | 295   | 5,15   | 57.24 (51.06 to 64.15)    | 1334  | 5,07   | 263.25 (249.49 to 277.76)   | 1796   | 5,05   | 355.48 (339.41 to 372.31)    |
| Black African               | 598   | 9,98   | 59.94 (55.32 to 64.94)    | 1184  | 9,95   | 118.99 (112.40 to 125.96)   | 1245   | 9,96   | 125.05 (118.29 to 132.19)    |
| Chinese                     | 75    | 3,89   | 19.27 (15.37 to 24.17)    | 96    | 3,89   | 24.65 (20.18 to 30.11)      | 218    | 3,89   | 56.09 (49.12 to 64.06)       |
| Other                       | 495   | 14,65  | 33.79 (30.94 to 36.90)    | 1524  | 14,58  | 104.56 (99.44 to 109.94)    | 1951   | 14,55  | 134.06 (128.24 to 140.14)    |
| Not recorded                | 2874  | 100,69 | 28.54 (27.52 to 29.61)    | 16577 | 99,58  | 166.47 (163.96 to 169.03)   | 32207  | 98,57  | 326.75 (323.20 to 330.34)    |
|                             |       |        |                           |       |        |                             |        |        |                              |
| Townsend                    |       |        |                           |       |        |                             |        |        |                              |
| Quintile 1 (least deprived) | 3998  | 103,66 | 38.57 (37.39 to 39.78)    | 20766 | 102,16 | 203.26 (200.52 to 206.05)   | 38528  | 100,85 | 382.02 (378.22 to 385.85)    |
| 2                           | 3625  | 96,46  | 37.58 (36.38 to 38.82)    | 18968 | 95,04  | 199.58 (196.76 to 202.44)   | 34916  | 93,89  | 371.89 (368.01 to 375.81)    |
| 3                           | 3094  | 86,66  | 35.70 (34.47 to 36.98)    | 16378 | 85,47  | 191.63 (188.72 to 194.59)   | 29815  | 84,44  | 353.07 (349.09 to 357.10)    |
| 4                           | 2929  | 79,34  | 36.92 (35.60 to 38.28)    | 13454 | 78,42  | 171.57 (168.70 to 174.50)   | 24217  | 77,55  | 312.28 (308.37 to 316.24)    |
| Quintile 5 (most deprived)  | 2787  | 73,30  | 38.02 (36.63 to 39.46)    | 10712 | 72,67  | 147.41 (144.64 to 150.23)   | 17352  | 72,11  | 240.62 (237.06 to 244.22)    |
| Not recorded                | 45    | 1,28   | 35.06 (26.18 to 46.96)    | 166   | 1,27   | 130.45 (112.04 to 151.88)   | 247    | 1,27   | 194.78 (171.95 to 220.65)    |

**Supplementary table 6b: Background crude incidence rates per 100,000 person years (95% CI) of secondary outcomes in people aged 16+ for the 5 calendar years 2015-2019 using primary care data from the QResearch database (representative 20% sample of England) linked to hospital and mortality records.**

|        | Cerebral Venous Sinus Thrombosis (CVST) |                     | Ischaemic stroke |                              | Myocardial infarction |                           | Other rare arterial thrombotic event |                        |
|--------|-----------------------------------------|---------------------|------------------|------------------------------|-----------------------|---------------------------|--------------------------------------|------------------------|
|        | count                                   | Rate (95% CI)       | count            | Rate (95% CI)                | count                 | Rate (95% CI)             | count                                | Rate (95% CI)          |
| total  | 559                                     | 1.26 (1.16 to 1.37) | 108707           | 251.24 (249.75 to 252.74)    | 76546                 | 176.04 (174.80 to 177.29) | 8369                                 | 18.94 (18.54 to 19.35) |
| Sex    |                                         |                     |                  |                              |                       |                           |                                      |                        |
| female | 346                                     | 1.56 (1.40 to 1.73) | 54351            | 249.97 (247.88 to 252.08)    | 28099                 | 127.75 (126.27 to 129.25) | 3690                                 | 16.63 (16.10 to 17.18) |
| male   | 213                                     | 0.97 (0.85 to 1.11) | 54356            | 252.52 (250.41 to 254.65)    | 48447                 | 225.47 (223.48 to 227.49) | 4679                                 | 21.27 (20.67 to 21.89) |
| Age    |                                         |                     |                  |                              |                       |                           |                                      |                        |
| 16-19  | 29                                      | 1.20 (0.84 to 1.73) | 79               | 3.28 (2.63 to 4.09)          | 10                    | 0.42 (0.22 to 0.77)       | 17                                   | 0.71 (0.44 to 1.14)    |
| 20-24  | 54                                      | 1.44 (1.10 to 1.87) | 239              | 6.36 (5.60 to 7.22)          | 59                    | 1.57 (1.22 to 2.02)       | 34                                   | 0.90 (0.65 to 1.27)    |
| 25-29  | 50                                      | 1.14 (0.87 to 1.51) | 407              | 9.30 (8.44 to 10.25)         | 153                   | 3.50 (2.98 to 4.10)       | 45                                   | 1.03 (0.77 to 1.38)    |
| 30-34  | 54                                      | 1.25 (0.95 to 1.63) | 733              | 16.93 (15.75 to 18.20)       | 417                   | 9.62 (8.74 to 10.59)      | 103                                  | 2.38 (1.96 to 2.88)    |
| 35-39  | 48                                      | 1.22 (0.92 to 1.61) | 1180             | 29.96 (28.30 to 31.72)       | 971                   | 24.64 (23.13 to 26.23)    | 123                                  | 3.12 (2.61 to 3.72)    |
| 40-44  | 50                                      | 1.34 (1.01 to 1.76) | 2066             | 55.45 (53.11 to 57.89)       | 2142                  | 57.46 (55.08 to 59.94)    | 213                                  | 5.70 (4.98 to 6.52)    |
| 45-49  | 64                                      | 1.65 (1.29 to 2.11) | 3879             | 100.55 (97.44 to 103.77)     | 4346                  | 112.65 (109.35 to 116.04) | 409                                  | 10.54 (9.56 to 11.61)  |
| 50-54  | 42                                      | 1.12 (0.83 to 1.52) | 6014             | 162.66 (158.60 to 166.82)    | 6307                  | 170.70 (166.54 to 174.97) | 598                                  | 16.00 (14.76 to 17.33) |
| 55-59  | 32                                      | 1.01 (0.71 to 1.42) | 7555             | 242.47 (237.06 to 248.00)    | 7504                  | 241.30 (235.90 to 246.82) | 735                                  | 23.17 (21.55 to 24.90) |
| 60-64  | 42                                      | 1.58 (1.17 to 2.14) | 9049             | 351.21 (344.05 to 358.52)    | 7750                  | 300.85 (294.22 to 307.62) | 895                                  | 33.75 (31.61 to 36.04) |
| 65-69  | 25                                      | 0.95 (0.64 to 1.40) | 12411            | 493.02 (484.42 to 501.77)    | 9116                  | 360.83 (353.50 to 368.32) | 1050                                 | 39.98 (37.63 to 42.47) |
| 70-74  | 26                                      | 1.30 (0.88 to 1.91) | 13820            | 741.64 (729.37 to 754.10)    | 8905                  | 471.14 (461.45 to 481.03) | 1088                                 | 54.66 (51.50 to 58.00) |
| 75-79  | 19                                      | 1.25 (0.80 to 1.96) | 15689            | 1145.75 (1127.97 to 1163.82) | 8884                  | 628.87 (615.93 to 642.08) | 1080                                 | 71.32 (67.19 to 75.70) |
| 80-84  | 11                                      | 1.02 (0.56 to 1.84) | 15344            | 1644.05 (1618.24 to 1670.27) | 8633                  | 875.87 (857.59 to 894.55) | 921                                  | 85.82 (80.46 to 91.55) |

|               |     |                     |       |                              |       |                              |      |                           |
|---------------|-----|---------------------|-------|------------------------------|-------|------------------------------|------|---------------------------|
| 85-89         | 10  | 1.57 (0.85 to 2.92) | 11881 | 2247.04 (2207.00 to 2287.81) | 6791  | 1182.66 (1154.86 to 1211.12) | 672  | 106.31 (98.57 to 114.66)  |
| 90-94         | *   | 1.13 (0.36 to 3.49) | 6356  | 2959.24 (2887.38 to 3032.89) | 3512  | 1463.83 (1416.21 to 1513.05) | 296  | 112.06 (100.00 to 125.58) |
| 95+           | *   | n/a                 | 1773  | 3432.20 (3276.10 to 3595.74) | 937   | 1611.09 (1511.16 to 1717.62) | 75   | 116.95 (93.27 to 146.66)  |
|               |     |                     |       |                              |       |                              |      |                           |
| Ethnicity     |     |                     |       |                              |       |                              |      |                           |
| White         | 340 | 1.24 (1.11 to 1.38) | 76319 | 285.27 (283.25 to 287.30)    | 52295 | 194.36 (192.71 to 196.04)    | 6155 | 22.46 (21.90 to 23.03)    |
| Indian        | 21  | 1.80 (1.17 to 2.75) | 1697  | 146.99 (140.16 to 154.15)    | 1886  | 163.93 (156.70 to 171.50)    | 91   | 7.79 (6.34 to 9.56)       |
| Pakistani     | 20  | 2.47 (1.59 to 3.82) | 1289  | 161.27 (152.70 to 170.32)    | 1694  | 213.18 (203.27 to 223.58)    | 70   | 8.64 (6.83 to 10.92)      |
| Bangladeshi   | *   | 0.53 (0.17 to 1.66) | 689   | 123.95 (115.03 to 133.56)    | 939   | 169.65 (159.14 to 180.85)    | 34   | 6.05 (4.33 to 8.47)       |
| Other Asian   | 10  | 1.31 (0.70 to 2.43) | 754   | 99.63 (92.76 to 107.00)      | 765   | 101.19 (94.27 to 108.62)     | 48   | 6.29 (4.74 to 8.35)       |
| Caribbean     | 11  | 2.12 (1.17 to 3.83) | 1487  | 294.65 (280.05 to 310.02)    | 743   | 144.93 (134.88 to 155.74)    | 124  | 23.94 (20.08 to 28.55)    |
| Black African | 18  | 1.79 (1.13 to 2.85) | 1187  | 119.39 (112.79 to 126.38)    | 492   | 49.17 (45.01 to 53.71)       | 85   | 8.47 (6.85 to 10.48)      |
| Chinese       | *   | 0.26 (0.04 to 1.82) | 173   | 44.52 (38.36 to 51.67)       | 112   | 28.77 (23.91 to 34.62)       | 7    | 1.79 (0.86 to 3.76)       |
| Other         | 22  | 1.50 (0.99 to 2.27) | 1418  | 97.26 (92.33 to 102.46)      | 1084  | 74.18 (69.89 to 78.73)       | 114  | 7.76 (6.46 to 9.32)       |
| Not recorded  | 113 | 1.12 (0.93 to 1.35) | 23694 | 239.26 (236.24 to 242.33)    | 16536 | 166.07 (163.55 to 168.62)    | 1641 | 16.27 (15.50 to 17.07)    |
|               |     |                     |       |                              |       |                              |      |                           |
| Townsend      |     |                     |       |                              |       |                              |      |                           |
| Quintile 1    | 115 | 1.10 (0.92 to 1.33) | 30653 | 302.27 (298.91 to 305.67)    | 19858 | 194.52 (191.83 to 197.24)    | 1806 | 17.37 (16.58 to 18.19)    |
| 2             | 112 | 1.16 (0.96 to 1.39) | 27032 | 286.14 (282.75 to 289.57)    | 18154 | 191.09 (188.33 to 193.89)    | 1772 | 18.32 (17.49 to 19.19)    |
| 3             | 115 | 1.32 (1.10 to 1.59) | 21626 | 254.39 (251.02 to 257.80)    | 15846 | 185.53 (182.67 to 188.44)    | 1766 | 20.34 (19.41 to 21.31)    |
| 4             | 128 | 1.61 (1.35 to 1.91) | 17270 | 221.28 (218.01 to 224.61)    | 13063 | 166.74 (163.90 to 169.62)    | 1619 | 20.37 (19.40 to 21.38)    |
| Quintile 5    | 88  | 1.20 (0.97 to 1.47) | 11924 | 164.52 (161.60 to 167.50)    | 9501  | 130.70 (128.10 to 133.35)    | 1385 | 18.85 (17.88 to 19.87)    |
| Not recorded  | *   | 0.78 (0.11 to 5.51) | 202   | 158.87 (138.40 to 182.36)    | 124   | 97.13 (81.45 to 115.82)      | 21   | 16.31 (10.63 to 25.02)    |



**Supplementary table 7a: Incidence rate ratios (IRR 95% CI) for primary composite outcomes in pre-defined risk periods immediately before and after exposure to vaccination, adjusted for calendar time from December 1, 2020 to April 24, 2021. Comparisons between different sensitivity analyses.**

|                               |                | Sensitivity 1* |                      | Sensitivity 2* |                      | Sensitivity 3* |                      | Sensitivity 4* |                      | Sensitivity 5* |                      | Sensitivity 6* |                      |
|-------------------------------|----------------|----------------|----------------------|----------------|----------------------|----------------|----------------------|----------------|----------------------|----------------|----------------------|----------------|----------------------|
|                               |                | events         | IRR (95% CI)         | events         | IRR (95% CI)         | events         | IRR (95% CI)         | events         | IRR (95% CI)         | events         | IRR (95% CI)         | events         | IRR (95% CI)         |
| <b>Thrombocytopenia</b>       |                |                |                      |                |                      |                |                      |                |                      |                |                      |                |                      |
| <b>ChAdOx1nCoV-19 vaccine</b> | baseline       | 3840           | 1.00                 | 1106           | 1.00                 | 3849           | 1.00                 | 2732           | 1.00                 | 3563           | 1.00                 | 3851           | 1.00                 |
|                               | -28 to -1 days | 909            | 0.67<br>(0.62, 0.72) |                |                      | 910            | 0.67<br>(0.62, 0.72) | 836            | 0.65<br>(0.60, 0.71) | 899            | 0.67<br>(0.62, 0.72) | 910            | 0.66<br>(0.61, 0.71) |
|                               | 0 day          | 19             | 0.40<br>(0.25, 0.62) | 19             | 0.37<br>(0.23, 0.59) | 19             | 0.39<br>(0.25, 0.62) | 19             | 0.46<br>(0.29, 0.72) | 19             | 0.39<br>(0.25, 0.62) | 19             | 0.39<br>(0.25, 0.61) |
|                               | 1-7 days       | 331            | 0.98<br>(0.87, 1.10) | 331            | 0.91<br>(0.76, 1.09) | 331            | 0.97<br>(0.87, 1.10) | 270            | 0.94<br>(0.82, 1.08) | 320            | 0.98<br>(0.87, 1.10) | 331            | 0.97<br>(0.86, 1.09) |
|                               | 8-14 days      | 425            | 1.30<br>(1.16, 1.44) | 438            | 1.26<br>(1.08, 1.47) | 438            | 1.32<br>(1.19, 1.47) | 324            | 1.23<br>(1.08, 1.41) | 410            | 1.33<br>(1.19, 1.47) | 438            | 1.32<br>(1.18, 1.47) |
|                               | 15-21 days     | 332            | 1.08<br>(0.96, 1.22) | 337            | 1.06<br>(0.91, 1.23) | 337            | 1.08<br>(0.96, 1.22) | 238            | 1.00<br>(0.86, 1.16) | 304            | 1.09<br>(0.97, 1.22) | 337            | 1.08<br>(0.96, 1.21) |
|                               | 22-28 days     | 354            | 1.27<br>(1.13, 1.42) | 356            | 1.26<br>(1.10, 1.44) | 356            | 1.26<br>(1.12, 1.41) | 240            | 1.19<br>(1.03, 1.38) | 314            | 1.27<br>(1.13, 1.42) | 356            | 1.26<br>(1.12, 1.41) |
| <b>BNT162b2 mRNA vaccine</b>  | baseline       | 1993           | 1.00                 | 1157           | 1.00                 | 1997           | 1.00                 | 1372           | 1.00                 | 1871           | 1.00                 | 1862           | 1.00                 |
|                               | -28 to -1 days | 504            | 0.63<br>(0.57, 0.70) |                |                      | 504            | 0.62<br>(0.56, 0.69) | 499            | 0.62<br>(0.56, 0.69) | 503            | 0.63<br>(0.56, 0.69) | 461            | 0.62<br>(0.56, 0.69) |
|                               | 0 day          | 13             | 0.41<br>(0.24, 0.71) | 13             | 0.33<br>(0.18, 0.59) | 13             | 0.40<br>(0.23, 0.69) | 13             | 0.41<br>(0.23, 0.70) | 13             | 0.41<br>(0.23, 0.70) | 12             | 0.42<br>(0.24, 0.74) |
|                               | 1-7 days       | 240            | 1.02<br>(0.89, 1.18) | 243            | 0.86<br>(0.69, 1.06) | 243            | 1.01<br>(0.88, 1.16) | 239            | 1.00<br>(0.86, 1.15) | 243            | 1.02<br>(0.89, 1.18) | 204            | 0.95<br>(0.82, 1.11) |
|                               | 8-14 days      | 253            | 1.03<br>(0.90, 1.18) | 254            | 0.92<br>(0.76, 1.11) | 254            | 1.01<br>(0.88, 1.16) | 251            | 1.00<br>(0.87, 1.16) | 253            | 1.02<br>(0.89, 1.17) | 214            | 0.98<br>(0.84, 1.13) |
|                               | 15-21 days     | 258            | 1.07<br>(0.94, 1.23) | 259            | 1.02<br>(0.86, 1.21) | 259            | 1.05<br>(0.92, 1.20) | 240            | 1.04<br>(0.90, 1.20) | 259            | 1.06<br>(0.93, 1.22) | 217            | 1.02<br>(0.88, 1.18) |
|                               | 22-28 days     | 241            | 1.09<br>(0.95, 1.25) | 241            | 1.05<br>(0.89, 1.23) | 241            | 1.06<br>(0.92, 1.22) | 205            | 1.03<br>(0.89, 1.20) | 239            | 1.08<br>(0.94, 1.23) | 215            | 1.06<br>(0.91, 1.22) |

|                                 |                |      |                         |      |                             |      |                      |      |                      |      |                         |      |                      |
|---------------------------------|----------------|------|-------------------------|------|-----------------------------|------|----------------------|------|----------------------|------|-------------------------|------|----------------------|
| <b>SARS-CoV-2 positive test</b> | baseline       | 380  | 1.00                    | 378  | 1.00                        |      |                      |      |                      | 354  | 1.00                    |      |                      |
|                                 | -28 to -1 days | 427  | 4.67<br>(4.02, 5.43)    |      |                             |      |                      |      |                      | 428  | 4.72<br>(4.06, 5.48)    |      |                      |
|                                 | 0 day          | 298  | 75.50<br>(64.25, 88.73) | 564  | 160.48<br>(134.56, 192, 38) |      |                      |      |                      | 297  | 75.75<br>(64.48, 89.00) |      |                      |
|                                 | 1-7 days       | 395  | 13.94<br>(11.99, 16.20) | 494  | 19.8<br>(16,68, 23,66)      |      |                      |      |                      | 398  | 14.04<br>(12.09, 16.32) |      |                      |
|                                 | 8-14 days      | 149  | 5.18<br>(4.26, 6.29)    | 183  | 7.23<br>(5.90, 8.87)        |      |                      |      |                      | 151  | 5.27<br>(4.34, 6.40)    |      |                      |
|                                 | 15-21 days     | 56   | 1.91<br>(1.44, 2.54)    | 81   | 3.16<br>(2.44, 4.08)        |      |                      |      |                      | 56   | 1.91<br>(1.44, 2.54)    |      |                      |
|                                 | 22-28 days     | 45   | 1.50<br>(1.10, 2.05)    | 54   | 2.10<br>(1.59, 2.82)        |      |                      |      |                      | 45   | 1.50<br>(1.10, 2.05)    |      |                      |
| <b>Venous thromboembolism</b>   |                |      |                         |      |                             |      |                      |      |                      |      |                         |      |                      |
| <b>ChAdOx1nC oV-19 vaccine</b>  | baseline       | 9314 | 1.00                    | 2320 | 1.00                        | 9837 | 1.00                 | 7488 | 1.00                 | 9222 | 1.00                    | 9846 | 1.00                 |
|                                 | -28 to -1 days | 2520 | 0.74<br>(0.70, 0.78)    |      |                             | 2561 | 0.70<br>(0.66, 0.73) | 2401 | 0.69<br>(0.66, 0.73) | 2548 | 0.70<br>(0.66, 0.73)    | 2561 | 0.69<br>(0.66, 0.72) |
|                                 | 0 day          | 46   | 0.45<br>(0.33, 0.60)    | 53   | 0.46<br>(0.35, 0.62)        | 53   | 0.46<br>(0.35, 0.60) | 46   | 0.47<br>(0.35, 0.63) | 52   | 0.46<br>(0.35, 0.60)    | 53   | 0.45<br>(0.35, 0.59) |
|                                 | 1-7 days       | 613  | 0.85<br>(0.78, 0.93)    | 746  | 0.92<br>(0.82, 1.04)        | 746  | 0.92<br>(0.85, 1.00) | 638  | 0.96<br>(0.87, 1.04) | 736  | 0.92<br>(0.85, 1.00)    | 746  | 0.91<br>(0.84, 0.98) |
|                                 | 8-14 days      | 742  | 1.07<br>(0.99, 1.16)    | 870  | 1.12<br>(1.00, 1.24)        | 870  | 1.10<br>(1.02, 1.18) | 663  | 1.09<br>(0.99, 1.19) | 830  | 1.10<br>(1.02, 1.18)    | 870  | 1.08<br>(1.01, 1.17) |
|                                 | 15-21 days     | 634  | 0.99<br>(0.91, 1.08)    | 763  | 1.08<br>(0.97, 1.19)        | 763  | 1.03<br>(0.95, 1.12) | 560  | 1.03<br>(0.93, 1.13) | 702  | 1.04<br>(0.96, 1.12)    | 763  | 1.02<br>(0.94, 1.11) |
|                                 | 22-28 days     | 536  | 0.94<br>(0.86, 1.03)    | 645  | 1.02<br>(0.93, 1.13)        | 645  | 0.97<br>(0.89, 1.06) | 451  | 1.01<br>(0.91, 1.12) | 576  | 0.98<br>(0.90, 1.06)    | 645  | 0.96<br>(0.88, 1.05) |
| <b>BNT162b2 mRNA vaccine</b>    | baseline       | 4202 | 1.00                    | 2388 | 1.00                        | 4584 | 1.00                 | 3322 | 1.00                 | 4315 | 1.00                    | 4275 | 1.00                 |
|                                 | -28 to -1 days | 1197 | 0.66<br>(0.62, 0.71)    |      |                             | 1224 | 0.63<br>(0.59, 0.68) | 1199 | 0.62<br>(0.58, 0.67) | 1220 | 0.64<br>(0.59, 0.68)    | 1157 | 0.63<br>(0.59, 0.68) |
|                                 | 0 day          | 24   | 0.37                    | 25   | 0.32                        | 25   | 0.35                 | 25   | 0.35                 | 25   | 0.35                    | 22   | 0.33                 |

|                                 |                |       |                         |       |                         |       |                      |       |                      |       |                         |       |                      |
|---------------------------------|----------------|-------|-------------------------|-------|-------------------------|-------|----------------------|-------|----------------------|-------|-------------------------|-------|----------------------|
|                                 |                |       | (0.25, 0.55)            |       | (0.21, 0.48)            |       | (0.23, 0.52)         |       | (0.24, 0.52)         |       | (0.24, 0.52)            |       | (0.21, 0.50)         |
|                                 | 1-7 days       | 405   | 0.84<br>(0.76, 0.93)    | 486   | 0.84<br>(0.72, 0.97)    | 486   | 0.91<br>(0.83, 1.01) | 477   | 0.91<br>(0.82, 1.00) | 482   | 0.92<br>(0.83, 1.01)    | 415   | 0.83<br>(0.75, 0.92) |
|                                 | 8-14 days      | 464   | 0.92<br>(0.83, 1.02)    | 555   | 0.96<br>(0.84, 1.09)    | 555   | 0.98<br>(0.90, 1.08) | 544   | 1.00<br>(0.91, 1.10) | 553   | 0.99<br>(0.90, 1.08)    | 477   | 0.92<br>(0.83, 1.01) |
|                                 | 15-21 days     | 429   | 0.85<br>(0.77, 0.95)    | 514   | 0.94<br>(0.83, 1.06)    | 514   | 0.90<br>(0.82, 0.99) | 479   | 0.94<br>(0.85, 1.04) | 510   | 0.91<br>(0.82, 1.00)    | 425   | 0.82<br>(0.74, 0.91) |
|                                 | 22-28 days     | 393   | 0.85<br>(0.76, 0.94)    | 474   | 0.95<br>(0.85, 1.07)    | 474   | 0.89<br>(0.80, 0.98) | 408   | 0.92<br>(0.82, 1.02) | 473   | 0.89<br>(0.81, 0.98)    | 419   | 0.87<br>(0.78, 0.96) |
| <b>SARS-CoV-2 positive test</b> | baseline       | 1088  | 1.00                    | 1230  | 1.00                    |       |                      |       |                      | 1137  | 1.00                    |       |                      |
|                                 | -28 to -1 days | 946   | 3.37<br>(3.07, 3.70)    |       |                         |       |                      |       |                      | 1002  | 3.44<br>(3.14, 3.77)    |       |                      |
|                                 | 0 day          | 788   | 63.97<br>(58.01, 70.55) | 1510  | 84.42<br>(76.15, 93.56) |       |                      |       |                      | 826   | 63.57<br>(57.85, 69.85) |       |                      |
|                                 | 1-7 days       | 1232  | 13.86<br>(12.69, 15.13) | 1707  | 13.59<br>(12.31, 14.99) |       |                      |       |                      | 1303  | 13.79<br>(12.67, 15.00) |       |                      |
|                                 | 8-14 days      | 1346  | 14.49<br>(13.30, 15.78) | 1709  | 13.53<br>(12.33, 14.86) |       |                      |       |                      | 1366  | 13.87<br>(12.77, 15.07) |       |                      |
|                                 | 15-21 days     | 791   | 8.22<br>(7.47, 9.04)    | 1019  | 8.12<br>(7.37, 8.95)    |       |                      |       |                      | 802   | 7.88<br>(7.19, 8.65)    |       |                      |
|                                 | 22-28 days     | 345   | 3.50<br>(3.09, 3.95)    | 444   | 3.62<br>(3.22, 4.07)    |       |                      |       |                      |       |                         |       |                      |
| <b>Arterial thromboembolism</b> |                |       |                         |       |                         |       |                      |       |                      |       |                         |       |                      |
| <b>ChAdOx1nC oV-19 vaccine</b>  | Baseline       | 29999 | 1.00                    | 11409 | 1.00                    | 31895 | 1.00                 | 22075 | 1.00                 | 28942 | 1.00                    | 31944 | 1.00                 |
|                                 | -28 to -1 days | 9022  | 0.84 (0.82, 0.86)       |       |                         | 9155  | 0.78<br>(0.77, 0.80) | 8574  | 0.78<br>(0.76, 0.80) | 9083  | 0.78<br>(0.76, 0.80)    | 9155  | 0.78<br>(0.76, 0.80) |
|                                 | 0 day          | 115   | 0.30 (0.25, 0.36)       | 143   | 0.31<br>(0.26, 0.37)    | 143   | 0.33<br>(0.28, 0.39) | 130   | 0.35<br>(0.29, 0.42) | 143   | 0.33<br>(0.28, 0.39)    | 143   | 0.33<br>(0.28, 0.39) |
|                                 | 1-7 days       | 2397  | 0.88<br>(0.84, 0.92)    | 2769  | 0.86<br>(0.81, 0.91)    | 2769  | 0.92<br>(0.88, 0.96) | 2300  | 0.90<br>(0.86, 0.95) | 2714  | 0.92<br>(0.88, 0.95)    | 2769  | 0.91<br>(0.87, 0.94) |
|                                 | 8-14 days      | 2647  | 0.99<br>(0.95, 1.03)    | 3065  | 0.98<br>(0.93, 1.04)    | 3065  | 1.03<br>(0.99, 1.07) | 2445  | 1.04<br>(0.99, 1.09) | 2942  | 1.02<br>(0.99, 1.07)    | 3065  | 1.01<br>(0.97, 1.05) |

|                                 |                |       |                         |       |                          |       |                      |       |                      |       |                         |       |                      |
|---------------------------------|----------------|-------|-------------------------|-------|--------------------------|-------|----------------------|-------|----------------------|-------|-------------------------|-------|----------------------|
|                                 | 15-21 days     | 2485  | 0.97<br>(0.93, 1.01)    | 2906  | 0.99<br>(0.94, 1.04)     | 2906  | 1.01<br>(0.97, 1.05) | 2228  | 1.04<br>(0.99, 1.09) | 2691  | 1.01<br>(0.97, 1.06)    | 2906  | 1.00<br>(0.96, 1.04) |
|                                 | 22-28 days     | 2385  | 1.00<br>(0.96, 1.04)    | 2734  | 1.00<br>(0.95, 1.05)     | 2734  | 1.01<br>(0.97, 1.06) | 1895  | 1.03<br>(0.98, 1.09) | 2479  | 1.02<br>(0.98, 1.06)    | 2734  | 1.01<br>(0.97, 1.05) |
| <b>BNT162b2 mRNA vaccine</b>    | baseline       | 19482 | 1.00                    | 12649 | 1.00                     | 21009 | 1.00                 | 14606 | 1.00                 | 19477 | 1.00                    | 19399 | 1.00                 |
|                                 | -28 to -1 days | 5925  | 0.74<br>(0.72, 0.77)    |       |                          | 5984  | 0.70<br>(0.68, 0.73) | 5917  | 0.70<br>(0.68, 0.72) | 5973  | 0.71<br>(0.69, 0.73)    | 5277  | 0.70<br>(0.68, 0.73) |
|                                 | 0 day          | 110   | 0.36<br>(0.30, 0.43)    | 125   | 0.32<br>(0.27, 0.38)     | 125   | 0.37<br>(0.31, 0.45) | 125   | 0.38<br>(0.32, 0.45) | 125   | 0.38<br>(0.32, 0.45)    | 105   | 0.36<br>(0.30, 0.44) |
|                                 | 1-7 days       | 1894  | 0.87<br>(0.83, 0.92)    | 2161  | 0.81<br>(0.75, 0.86)     | 2161  | 0.91<br>(0.87, 0.95) | 2148  | 0.91<br>(0.87, 0.95) | 2156  | 0.92<br>(0.88, 0.96)    | 1785  | 0.86<br>(0.82, 0.91) |
|                                 | 8-14 days      | 2083  | 0.94<br>(0.90, 0.98)    | 2377  | 0.92<br>(0.86, 0.97)     | 2377  | 0.97<br>(0.93, 1.01) | 2320  | 0.97<br>(0.93, 1.01) | 2372  | 0.98<br>(0.94, 1.02)    | 1988  | 0.93<br>(0.89, 0.98) |
|                                 | 15-21 days     | 2284  | 1.03<br>(0.98, 1.07)    | 2590  | 1.03<br>(0.98, 1.09)     | 2590  | 1.05<br>(1.00, 1.09) | 2393  | 1.08<br>(1.03, 1.13) | 2583  | 1.06<br>(1.01, 1.10)    | 2154  | 1.00<br>(0.95, 1.05) |
|                                 | 22-28 days     | 1961  | 0.93<br>(0.88, 0.97)    | 2221  | 0.95<br>(0.90, 1.00)     | 2221  | 0.94<br>(0.90, 0.98) | 1883  | 0.98<br>(0.93, 1.03) | 2211  | 0.95<br>(0.91, 0.99)    | 1956  | 0.92<br>(0.88, 0.96) |
|                                 |                |       |                         |       |                          |       |                      |       |                      |       |                         |       |                      |
| <b>SARS-CoV-2 positive test</b> | baseline       | 2376  | 1.00                    | 2225  | 1.00                     |       |                      |       |                      | 2508  | 1.00                    |       |                      |
|                                 | -28 to -1 days | 2913  | 4.86<br>(4.59, 5.16)    |       |                          |       |                      |       |                      | 3044  | 4.60<br>(4.35, 4.87)    |       |                      |
|                                 | 0 day          | 1096  | 45.15<br>(41.89, 48.67) | 2300  | 97.66<br>(90.27, 105.66) |       |                      |       |                      | 1160  | 42.33<br>(39.40, 45.47) |       |                      |
|                                 | 1-7 days       | 1138  | 6.58<br>(6.11, 7.09)    | 1630  | 9.85<br>(9.07, 10.68)    |       |                      |       |                      | 1288  | 6.56<br>(6.13, 7.03)    |       |                      |
|                                 | 8-14 days      | 798   | 4.48<br>(4.13, 4.87)    | 978   | 5.86<br>(5.36, 6.39)     |       |                      |       |                      | 913   | 4.53<br>(4.19, 4.89)    |       |                      |
|                                 | 15-21 days     | 361   | 1.94<br>(1.74, 2.17)    | 459   | 2.72<br>(2.43, 3.04)     |       |                      |       |                      | 422   | 2.02<br>(1.82, 2.24)    |       |                      |
|                                 | 22-28 days     | 242   | 1.24<br>(1.09, 1.42)    | 295   | 1.74<br>(1.53, 1.98)     |       |                      |       |                      | 273   | 1.26<br>(1.12, 1.43)    |       |                      |

\*Sensitivity 1: excluding those who died from the outcome; Sensitivity 2: restricting analysis to the period post-vaccination, without censoring at death (restricting analysis to the period post-SARS-CoV-2 positive test, without censoring at death); Sensitivity 3: censoring at 12 weeks post vaccination, Sensitivity 4: censoring on 10 March 2021; Sensitivity 5: restricting the study period until the 31 March 2021; Sensitivity 6: dropping those who received vaccination before 1 January 2021.

**Supplementary table 7b: Incidence rate ratios (IRR 95% CI) for secondary outcomes in pre-defined risk periods immediately before and after exposure to vaccination, adjusted for calendar time from December 1, 2020 to April 24, 2021. Comparisons between different sensitivity analyses. (see footnote table 5a for description of sensitivity analyses)**

|                                         |                              | Sensitivity 1* |                       | Sensitivity 2* |                      | Sensitivity 3* |                       | Sensitivity 4* |                       | Sensitivity 5* |                       | Sensitivity 6* |                       |
|-----------------------------------------|------------------------------|----------------|-----------------------|----------------|----------------------|----------------|-----------------------|----------------|-----------------------|----------------|-----------------------|----------------|-----------------------|
|                                         |                              | events         | IRR (95% CI)          | events         | IRR (95% CI)         | events         | IRR (95% CI)          | events         | IRR (95% CI)          | events         | IRR (95% CI)          | events         | IRR (95% CI)          |
| <b>Cerebral venous sinus thrombosis</b> |                              |                |                       |                |                      |                |                       |                |                       |                |                       |                |                       |
| <b>ChAdOx1nCoV-19 vaccine</b>           | baseline                     | 44             | 1.00                  | 13             | 1.00                 | 44             | 1.00                  | 32             | 1.00                  | 41             | 1.00                  | 44             | 1.00                  |
|                                         | -28 to -1 days               | 9              | 0.59<br>(0.27, 1.25)  |                |                      | 9              | 0.59<br>(0.28, 1.25)  | 7              | 0.51<br>(0.21, 1.26)  | 9              | 0.59<br>(0.27, 1.25)  | 9              | 0.59<br>(0.28, 1.27)  |
|                                         | 0 day                        | *              | 1.95<br>(0.26, 14.48) | *              | 0.70<br>(0.07, 7.55) | *              | 1.94<br>(0.26, 14.38) | *              | 3.23<br>(0.41, 25.52) | *              | 1.96<br>(0.26, 14.49) | *              | 1.97<br>(0.26, 14.61) |
|                                         | 1-7 days                     | *              | 0.51<br>(0.12, 2.19)  | *              | 0.23<br>(0.04, 1.46) | *              | 0.51<br>(0.12, 2.16)  | *              | 0.46<br>(0.06, 3.73)  | *              | 0.52<br>(0.12, 2.19)  | *              | 0.51<br>(0.12, 2.19)  |
|                                         | 8-14 days                    | 15             | 4.01<br>(2.08, 7.71)  | 15             | 1.94<br>(0.57, 6.60) | 15             | 3.94<br>(2.05, 7.56)  | 5              | 2.94<br>(0.92, 9.45)  | 11             | 4.01<br>(2.08, 7.70)  | 15             | 3.95<br>(2.05, 7.64)  |
|                                         | 15-21 days                   | 8              | 2.15<br>(0.96, 4.85)  | 8              | 1.27<br>(0.40, 4.07) | 8              | 2.10<br>(0.94, 4.73)  | *              | 1.87<br>(0.46, 7.67)  | 5              | 2.16<br>(0.96, 4.87)  | 8              | 2.13<br>(0.94, 4.81)  |
|                                         | 22-28 days                   | *              | 0.60<br>(0.14, 2.55)  | *              | 0.38<br>(0.08, 1.87) | *              | 0.58<br>(0.14, 2.48)  | *              | n/a                   | *              | 0.60<br>(0.14, 2.58)  | *              | 0.59<br>(0.14, 2.51)  |
|                                         | <b>BNT162b2 mRNA vaccine</b> | baseline       | 21                    | 1.00           | 10                   | 1.00           | 21                    | 1.00           | 15                    | 1.00           | 20                    | 1.00           | 18                    |
| -28 to -1 days                          |                              | 7              | 1.04<br>(0.43, 2.51)  |                |                      | 7              | 0.99<br>(0.41, 2.40)  | 7              | 0.81<br>(0.32, 2.04)  | 7              | 1.04<br>(0.43, 2.52)  | 6              | 1.05<br>(0.40, 2.78)  |
| 0 day                                   |                              | *              | n/a                   | *              | n/a                  | *              | n/a                   | *              | n/a                   |                |                       |                |                       |
| 1-7 days                                |                              | *              | n/a                   | *              | n/a                  | *              | n/a                   | *              | n/a                   |                |                       |                |                       |
| 8-14 days                               |                              | *              | 2.57<br>(0.85, 7.78)  | *              | 1.43<br>(0.27, 7.47) | *              | 2.45<br>(0.81, 7.40)  | *              | 1.86<br>(0.51, 6.84)  | *              | 2.56<br>(0.85, 7.76)  | *              | 2.95<br>(0.94, 9.24)  |
| 15-21 days                              |                              | 6              | 3.58<br>(1.39, 9.27)  | 6              | 2.37<br>(0.57, 9.74) | 6              | 3.38<br>(1.31, 8.72)  | *              | 2.75<br>(0.83, 9.07)  | 5              | 3.59<br>(1.39, 9.27)  | 5              | 3.60<br>(1.25, 10.33) |
| 22-28 days                              |                              | *              | n/a                   | *              | n/a                  | *              | n/a                   | *              | n/a                   |                |                       |                |                       |
| <b>SARS-CoV-2 positive test</b>         | baseline                     | *              | 1.00                  | *              | 1.00                 |                |                       |                |                       | *              | 1.00                  |                |                       |
|                                         | -28 to -1 days               | *              | 2.40<br>(0.22, 25.98) | *              |                      |                |                       |                |                       | *              | 2.40<br>(0.22, 25.93) |                |                       |

|                                |                |      |                           |      |                            |       |                      |      |                      |                           |                      |       |                      |
|--------------------------------|----------------|------|---------------------------|------|----------------------------|-------|----------------------|------|----------------------|---------------------------|----------------------|-------|----------------------|
|                                | 0 day          | *    | 115.70<br>(16.48, 812.29) | *    | 173.30<br>(18.75, 1601.53) |       |                      |      | *                    | 115.46<br>(16.44, 810.75) |                      |       |                      |
|                                | 1-7 days       | *    | 12.90<br>(1.86, 89.64)    | *    | 5.70<br>(0.35, 91.90)      |       |                      |      | *                    | 12.88<br>(1.85, 89.49)    |                      |       |                      |
|                                | 8-14 days      | *    | 13.43<br>(1.99, 90.59)    | *    | 20.46<br>(2.28, 183.68)    |       |                      |      | *                    | 13.40<br>(1.99, 90.40)    |                      |       |                      |
|                                | 15-21 days     | *    | 6.33 (0.63, 63.67)        | *    | 27.30<br>(3.36, 224.97)    |       |                      |      | *                    | 6.32<br>(0.63, 63.54)     |                      |       |                      |
|                                | 22-28 days     | *    | 5.81 (0.59, 57.24)        | *    | 6.56<br>(0.49, 86.78)      |       |                      |      | *                    | 5.80<br>(0.59, 57.15)     |                      |       |                      |
| <b>Ischaemic Stroke</b>        |                |      |                           |      |                            |       |                      |      |                      |                           |                      |       |                      |
| <b>ChAdOx1nC oV-19 vaccine</b> | baseline       | 8995 | 1.00                      | 3937 | 1.00                       | 10320 | 1.00                 | 7028 | 1.00                 | 9371                      | 1.00                 | 10355 | 1.00                 |
|                                | -28 to -1 days | 2578 | 0.78<br>(0.74, 0.82)      |      |                            | 2671  | 0.67<br>(0.64, 0.71) | 2496 | 0.68<br>(0.65, 0.71) | 2647                      | 0.67<br>(0.64, 0.70) | 2671  | 0.67<br>(0.64, 0.70) |
|                                | 0 day          | 27   | 0.23<br>(0.16, 0.34)      | 43   | 0.26<br>(0.19, 0.36)       | 43    | 0.30<br>(0.22, 0.40) | 38   | 0.30<br>(0.22, 0.42) | 43                        | 0.29<br>(0.22, 0.40) | 43    | 0.29<br>(0.21, 0.39) |
|                                | 1-7 days       | 751  | 0.92<br>(0.85, 0.99)      | 968  | 0.86<br>(0.78, 0.95)       | 968   | 0.95<br>(0.88, 1.01) | 838  | 0.98<br>(0.91, 1.06) | 948                       | 0.94<br>(0.88, 1.01) | 968   | 0.93<br>(0.87, 1.00) |
|                                | 8-14 days      | 800  | 1.01<br>(0.94, 1.09)      | 1080 | 1.01<br>(0.92, 1.10)       | 1080  | 1.07<br>(1.01, 1.15) | 878  | 1.11<br>(1.03, 1.20) | 1039                      | 1.07<br>(1.00, 1.15) | 1080  | 1.06<br>(0.99, 1.13) |
|                                | 15-21 days     | 689  | 0.92<br>(0.85, 1.00)      | 965  | 0.96<br>(0.88, 1.04)       | 965   | 1.00<br>(0.93, 1.07) | 768  | 1.06<br>(0.98, 1.15) | 904                       | 1.00<br>(0.94, 1.07) | 965   | 0.99<br>(0.92, 1.06) |
|                                | 22-28 days     | 671  | 0.97<br>(0.89, 1.05)      | 920  | 0.99<br>(0.91, 1.07)       | 920   | 1.02<br>(0.95, 1.10) | 673  | 1.07<br>(0.99, 1.17) | 857                       | 1.03<br>(0.96, 1.10) | 920   | 1.01<br>(0.94, 1.08) |
| <b>BNT162b2 mRNA vaccine</b>   | baseline       | 5444 | 1.00                      | 4217 | 1.00                       | 6374  | 1.00                 | 4364 | 1.00                 | 5960                      | 1.00                 | 5778  | 1.00                 |
|                                | -28 to -1 days | 1575 | 0.67<br>(0.63, 0.71)      |      |                            | 1614  | 0.61<br>(0.58, 0.65) | 1595 | 0.61<br>(0.58, 0.65) | 1611                      | 0.62<br>(0.58, 0.65) | 1428  | 0.62<br>(0.58, 0.66) |
|                                | 0 day          | 28   | 0.31<br>(0.22, 0.45)      | 33   | 0.24<br>(0.17, 0.34)       | 33    | 0.31<br>(0.22, 0.44) | 33   | 0.32<br>(0.23, 0.45) | 33                        | 0.32<br>(0.23, 0.45) | 26    | 0.29<br>(0.20, 0.43) |
|                                | 1-7 days       | 579  | 0.92<br>(0.84, 1.00)      | 718  | 0.77<br>(0.68, 0.86)       | 718   | 0.95<br>(0.88, 1.03) | 713  | 0.97<br>(0.89, 1.05) | 718                       | 0.97<br>(0.89, 1.05) | 574   | 0.89<br>(0.82, 0.98) |
|                                | 8-14 days      | 610  | 0.95                      | 789  | 0.90                       | 789   | 1.02                 | 773  | 1.04                 | 787                       | 1.03                 | 637   | 0.96                 |

|                                 |                              |       |                         |      |                        |       |                      |       |                      |       |                         |       |                      |
|---------------------------------|------------------------------|-------|-------------------------|------|------------------------|-------|----------------------|-------|----------------------|-------|-------------------------|-------|----------------------|
|                                 |                              |       | (0.87, 1.04)            |      | (0.81, 1.00)           |       | (0.94, 1.10)         |       | (0.96, 1.12)         |       | (0.95, 1.11)            |       | (0.88, 1.04)         |
|                                 | 15-21 days                   | 671   | 1.05<br>(0.97, 1.14)    | 862  | 1.03<br>(0.94, 1.14)   | 862   | 1.10<br>(1.02, 1.19) | 812   | 1.16<br>(1.07, 1.25) | 860   | 1.12<br>(1.04, 1.20)    | 692   | 1.03<br>(0.95, 1.12) |
|                                 | 22-28 days                   | 600   | 0.99<br>(0.91, 1.08)    | 765  | 0.98<br>(0.90, 1.07)   | 765   | 1.02<br>(0.94, 1.10) | 685   | 1.09<br>(1.00, 1.19) | 765   | 1.03<br>(0.96, 1.12)    | 650   | 0.97<br>(0.90, 1.06) |
| <b>SARS-CoV-2 positive test</b> | baseline                     | 772   | 1.00                    | 788  | 1.00                   |       |                      |       |                      | 977   | 1.00                    |       |                      |
|                                 | -28 to -1 days               | 1030  | 4.92<br>(4.45, 5.46)    |      |                        |       |                      |       |                      | 1123  | 4.21<br>(3.85, 4.62)    |       |                      |
|                                 | 0 day                        | 239   | 27.75<br>(23.87, 32.26) | 535  | 62.52<br>(54.0, 72.34) |       |                      |       |                      | 273   | 23.58<br>(20.56, 27.05) |       |                      |
|                                 | 1-7 days                     | 187   | 3.06<br>(2.60, 3.61)    | 298  | 4.98<br>(4.23, 5.85)   |       |                      |       |                      | 325   | 3.94<br>(3.47, 4.48)    |       |                      |
|                                 | 8-14 days                    | 163   | 2.62<br>(2.21, 3.11)    | 221  | 3.69<br>(3.11, 4.38)   |       |                      |       |                      | 273   | 3.25<br>(2.84, 3.73)    |       |                      |
|                                 | 15-21 days                   | 105   | 1.63<br>(1.33, 2.00)    | 149  | 2.48<br>(2.05, 3.00)   |       |                      |       |                      | 171   | 2.00<br>(1.70, 2.36)    |       |                      |
|                                 | 22-28 days                   | 75    | 1.13<br>(0.89, 1.44)    | 92   | 1.54<br>(1.22, 1.93)   |       |                      |       |                      | 108   | 1.26<br>(1.04, 1.54)    |       |                      |
|                                 | <b>Myocardial Infarction</b> |       |                         |      |                        |       |                      |       |                      |       |                         |       |                      |
| <b>ChAdOx1nC oV-19 vaccine</b>  | baseline                     | 21303 | 1.00                    | 7863 | 1.00                   | 22060 | 1.00                 | 15246 | 1.00                 | 19954 | 1.00                    | 22079 | 1.00                 |
|                                 | -28 to -1 days               | 6524  | 0.86<br>(0.84, 0.89)    |      |                        | 6565  | 0.83<br>(0.81, 0.86) | 6159  | 0.83<br>(0.80, 0.85) | 6515  | 0.83<br>(0.81, 0.86)    | 6565  | 0.83<br>(0.80, 0.85) |
|                                 | 0 day                        | 88    | 0.32<br>(0.26, 0.40)    | 103  | 0.34<br>(0.28, 0.42)   | 103   | 0.36<br>(0.29, 0.43) | 96    | 0.38<br>(0.31, 0.46) | 103   | 0.36<br>(0.29, 0.43)    | 103   | 0.35<br>(0.29, 0.43) |
|                                 | 1-7 days                     | 1704  | 0.88<br>(0.84, 0.93)    | 1881 | 0.88<br>(0.82, 0.94)   | 1881  | 0.92<br>(0.88, 0.97) | 1544  | 0.89<br>(0.84, 0.94) | 1846  | 0.92<br>(0.87, 0.96)    | 1881  | 0.91<br>(0.87, 0.96) |
|                                 | 8-14 days                    | 1867  | 0.97<br>(0.93, 1.02)    | 2028 | 0.96<br>(0.90, 1.03)   | 2028  | 0.99<br>(0.95, 1.04) | 1617  | 1.00<br>(0.94, 1.06) | 1945  | 0.99<br>(0.95, 1.04)    | 2028  | 0.98<br>(0.94, 1.03) |
|                                 | 15-21 days                   | 1815  | 0.98<br>(0.94, 1.04)    | 2000 | 1.00<br>(0.94, 1.06)   | 2000  | 1.02<br>(0.97, 1.07) | 1512  | 1.02<br>(0.97, 1.08) | 1848  | 1.02<br>(0.97, 1.07)    | 2000  | 1.01<br>(0.96, 1.06) |
|                                 | 22-28 days                   | 1747  | 1.01<br>(0.96, 1.06)    | 1889 | 1.01<br>(0.95, 1.06)   | 1889  | 1.02<br>(0.97, 1.07) | 1288  | 1.02<br>(0.96, 1.09) | 1699  | 1.02<br>(0.97, 1.07)    | 1889  | 1.01<br>(0.96, 1.06) |
|                                 | baseline                     | 14317 | 1.00                    | 8784 | 1.00                   | 15038 | 1.00                 | 10489 | 1.00                 | 13891 | 1.00                    | 13971 | 1.00                 |

|                                       |                |      |                         |      |                            |      |                      |      |                      |      |                         |      |                      |
|---------------------------------------|----------------|------|-------------------------|------|----------------------------|------|----------------------|------|----------------------|------|-------------------------|------|----------------------|
| <b>BNT162b2 mRNA vaccine</b>          | -28 to -1 days | 4461 | 0.78<br>(0.75, 0.81)    |      |                            | 4485 | 0.75<br>(0.72, 0.78) | 4436 | 0.74<br>(0.71, 0.77) | 4477 | 0.76<br>(0.73, 0.78)    | 3936 | 0.75<br>(0.72, 0.77) |
|                                       | 0 day          | 84   | 0.38<br>(0.31, 0.47)    | 95   | 0.37<br>(0.30, 0.46)       | 95   | 0.41<br>(0.33, 0.50) | 95   | 0.41<br>(0.33, 0.50) | 95   | 0.41<br>(0.33, 0.50)    | 80   | 0.40<br>(0.32, 0.49) |
|                                       | 1-7 days       | 1344 | 0.86<br>(0.81, 0.91)    | 1483 | 0.83<br>(0.76, 0.90)       | 1483 | 0.89<br>(0.85, 0.94) | 1472 | 0.88<br>(0.83, 0.94) | 1477 | 0.90<br>(0.85, 0.95)    | 1244 | 0.86<br>(0.81, 0.91) |
|                                       | 8-14 days      | 1532 | 0.95<br>(0.90, 1.00)    | 1668 | 0.95<br>(0.88, 1.02)       | 1668 | 0.97<br>(0.92, 1.02) | 1627 | 0.96<br>(0.91, 1.02) | 1665 | 0.98<br>(0.93, 1.03)    | 1409 | 0.94<br>(0.89, 0.99) |
|                                       | 15-21 days     | 1649 | 1.01<br>(0.96, 1.07)    | 1789 | 1.04<br>(0.98, 1.11)       | 1789 | 1.03<br>(0.98, 1.08) | 1643 | 1.05<br>(1.00, 1.11) | 1783 | 1.04<br>(0.99, 1.09)    | 1508 | 0.99<br>(0.94, 1.05) |
|                                       | 22-28 days     | 1390 | 0.90<br>(0.85, 0.95)    | 1510 | 0.94<br>(0.89, 1.00)       | 1510 | 0.91<br>(0.86, 0.96) | 1258 | 0.93<br>(0.88, 0.99) | 1502 | 0.92<br>(0.87, 0.97)    | 1349 | 0.90<br>(0.85, 0.95) |
| <b>SARS-CoV-2 positive test</b>       | baseline       | 1667 | 1.00                    | 1529 | 1.00                       |      |                      |      |                      | 1616 | 1.00                    |      |                      |
|                                       | -28 to -1 days | 1942 | 4.76<br>(4.44, 5.11)    |      |                            |      |                      |      |                      | 1989 | 4.75<br>(4.43, 5.09)    |      |                      |
|                                       | 0 day          | 871  | 53.34<br>(48.93, 58.15) | 1782 | 113.74<br>(103.69, 124.76) |      |                      |      |                      | 901  | 53.15<br>(48.86, 57.83) |      |                      |
|                                       | 1-7 days       | 939  | 8.06<br>(7.41, 8.76)    | 1323 | 12.01<br>(10.93, 13.21)    |      |                      |      |                      | 970  | 7.97<br>(7.34, 8.65)    |      |                      |
|                                       | 8-14 days      | 609  | 5.05<br>(4.58, 5.55)    | 731  | 6.56<br>(5.91, 7.27)       |      |                      |      |                      | 622  | 4.95<br>(4.50, 5.44)    |      |                      |
|                                       | 15-21 days     | 249  | 1.97<br>(1.72, 2.25)    | 303  | 2.68<br>(2.34, 3.06)       |      |                      |      |                      | 255  | 1.95<br>(1.71, 2.23)    |      |                      |
|                                       | 22-28 days     | 156  | 1.16<br>(0.99, 1.37)    | 194  | 1.70<br>(1.46, 1.99)       |      |                      |      |                      | 158  | 1.15<br>(0.98, 1.35)    |      |                      |
| <b>Other rare arterial thrombotic</b> |                |      |                         |      |                            |      |                      |      |                      |      |                         |      |                      |
| <b>ChAdOx1nCoV-19 vaccine</b>         | baseline       | 1444 | 1.00                    | 402  | 1.00                       | 1469 | 1.00                 | 1087 | 1.00                 | 1383 | 1.00                    | 1469 | 1.00                 |
|                                       | -28 to -1 days | 363  | 0.64<br>(0.56, 0.72)    |      |                            | 365  | 0.63<br>(0.56, 0.71) | 345  | 0.63<br>(0.55, 0.72) | 363  | 0.63<br>(0.56, 0.71)    | 365  | 0.62<br>(0.55, 0.70) |
|                                       | 0 day          | 5    | 0.25<br>(0.10, 0.61)    | 5    | 0.27<br>(0.11, 0.67)       | 5    | 0.25<br>(0.10, 0.59) | *    | 0.23<br>(0.09, 0.61) | 5    | 0.25<br>(0.10, 0.59)    | 5    | 0.24<br>(0.10, 0.58) |
|                                       | 1-7 days       | 102  | 0.74                    | 105  | 0.81                       | 105  | 0.74                 | 89   | 0.74                 | 103  | 0.74                    | 105  | 0.73                 |



|                                 |                |     |                         |     |                         |     |                      |     |                      |     |                         |     |                      |
|---------------------------------|----------------|-----|-------------------------|-----|-------------------------|-----|----------------------|-----|----------------------|-----|-------------------------|-----|----------------------|
|                                 |                |     | (0.60, 0.91)            |     | (0.60, 1.10)            |     | (0.60, 0.91)         |     | (0.59, 0.94)         |     | (0.60, 0.91)            |     | (0.59, 0.89)         |
|                                 | 8-14 days      | 154 | 1.17<br>(0.98, 1.40)    | 164 | 1.32<br>(1.02, 1.70)    | 164 | 1.21<br>(1.02, 1.43) | 137 | 1.27<br>(1.03, 1.55) | 160 | 1.21<br>(1.02, 1.44)    | 164 | 1.19<br>(1.00, 1.41) |
|                                 | 15-21 days     | 123 | 1.00<br>(0.82, 1.21)    | 127 | 1.09<br>(0.85, 1.39)    | 127 | 1.00<br>(0.82, 1.21) | 100 | 1.02<br>(0.81, 1.28) | 117 | 1.00<br>(0.83, 1.21)    | 127 | 0.99<br>(0.81, 1.19) |
|                                 | 22-28 days     | 111 | 1.00<br>(0.82, 1.23)    | 114 | 1.08<br>(0.85, 1.36)    | 114 | 0.99<br>(0.81, 1.21) | 87  | 1.05<br>(0.83, 1.34) | 106 | 1.00<br>(0.82, 1.22)    | 114 | 0.99<br>(0.81, 1.20) |
| <b>BNT162b2 mRNA vaccine</b>    | baseline       | 711 | 1.00                    | 444 | 1.00                    | 727 | 1.00                 | 499 | 1.00                 | 683 | 1.00                    | 671 | 1.00                 |
|                                 | -28 to -1 days | 183 | 0.60<br>(0.51, 0.71)    |     |                         | 183 | 0.59<br>(0.49, 0.70) | 181 | 0.62<br>(0.52, 0.74) | 183 | 0.59<br>(0.50, 0.70)    | 167 | 0.58<br>(0.49, 0.70) |
|                                 | 0 day          | *   | 0.08<br>(0.01, 0.57)    | *   | 0.06<br>(0.01, 0.45)    | *   | 0.08<br>(0.01, 0.55) | *   | 0.08<br>(0.01, 0.59) | *   | 0.08<br>(0.01, 0.56)    | *   | 0.09<br>(0.01, 0.61) |
|                                 | 1-7 days       | 89  | 1.01<br>(0.80, 1.27)    | 93  | 0.85<br>(0.60, 1.20)    | 93  | 1.02<br>(0.82, 1.28) | 93  | 1.09<br>(0.87, 1.37) | 93  | 1.03<br>(0.82, 1.29)    | 76  | 0.91<br>(0.71, 1.16) |
|                                 | 8-14 days      | 85  | 0.94<br>(0.75, 1.19)    | 88  | 0.86<br>(0.63, 1.17)    | 88  | 0.94<br>(0.75, 1.18) | 86  | 0.99<br>(0.78, 1.26) | 88  | 0.95<br>(0.75, 1.19)    | 71  | 0.83<br>(0.65, 1.07) |
|                                 | 15-21 days     | 103 | 1.16<br>(0.93, 1.43)    | 107 | 1.11<br>(0.84, 1.45)    | 107 | 1.16<br>(0.94, 1.43) | 96  | 1.21<br>(0.96, 1.52) | 107 | 1.16<br>(0.94, 1.44)    | 91  | 1.09<br>(0.87, 1.37) |
|                                 | 22-28 days     | 97  | 1.13<br>(0.91, 1.41)    | 102 | 1.12<br>(0.87, 1.43)    | 102 | 1.14<br>(0.92, 1.41) | 83  | 1.16<br>(0.91, 1.47) | 100 | 1.15<br>(0.93, 1.42)    | 97  | 1.19<br>(0.96, 1.49) |
| <b>SARS-CoV-2 positive test</b> | baseline       | 133 | 1.00                    | 148 | 1.00                    |     |                      |     |                      | 132 | 1.00                    |     |                      |
|                                 | -28 to -1 days | 162 | 4.81<br>(3.75, 6.18)    |     |                         |     |                      |     |                      | 164 | 4.71<br>(3.68, 6.02)    |     |                      |
|                                 | 0 day          | 55  | 36.71<br>(26.46, 50.93) | 90  | 46.11<br>(32.53, 65.37) |     |                      |     |                      | 55  | 35.17<br>(25.42, 48.67) |     |                      |
|                                 | 1-7 days       | 57  | 5.30<br>(3.84, 7.31)    | 66  | 4.86<br>(3.38, 6.98)    |     |                      |     |                      | 59  | 5.35<br>(3.91, 7.33)    |     |                      |
|                                 | 8-14 days      | 63  | 5.66<br>(4.15, 7.72)    | 75  | 5.49<br>(3.91, 7.71)    |     |                      |     |                      | 64  | 5.62<br>(4.14, 7.62)    |     |                      |
|                                 | 15-21 days     | 34  | 3.09<br>(2.11, 4.54)    | 45  | 3.30<br>(2.27, 4.80)    |     |                      |     |                      | 34  | 2.98<br>(2.03, 4.36)    |     |                      |
|                                 | 22-28 days     | 31  | 2.76<br>(1.86, 4.10)    | 37  | 2.70<br>(1.82, 3.99)    |     |                      |     |                      | 31  | 2.66<br>(1.79, 3.95)    |     |                      |

**Supplementary table 7c: Incidence rate ratios (IRR 95% CI) for coeliac (negative control) and anaphylaxis (positive control) in pre-defined risk periods immediately before and after exposure to vaccination, adjusted for calendar time from December 1, 2020 to April 24, 2021. Comparisons between different sensitivity analyses. (see footnote table 5a for description of sensitivity analyses)**

|                               |                | Sensitivity 1* |                      | Sensitivity 2* |                      | Sensitivity 3* |                      | Sensitivity 4* |                      | Sensitivity 5* |                      | Sensitivity 6* |                      |
|-------------------------------|----------------|----------------|----------------------|----------------|----------------------|----------------|----------------------|----------------|----------------------|----------------|----------------------|----------------|----------------------|
|                               |                | events         | IRR (95% CI)         | events         | IRR (95% CI)         | events         | IRR (95% CI)         | events         | IRR (95% CI)         | events         | IRR (95% CI)         | events         | IRR (95% CI)         |
| <b>Coeliac</b>                |                |                |                      |                |                      |                |                      |                |                      |                |                      |                |                      |
| <b>ChAdOx1nCoV-19 vaccine</b> | baseline       | 2070           | 1.00                 | 516            | 1.00                 | 2072           | 1.00                 | 1555           | 1.00                 | 1881           | 1.00                 | 2072           | 1.00                 |
|                               | -28 to -1 days | 688            | 0.95<br>(0.87, 1.05) |                |                      | 688            | 0.95<br>(0.87, 1.05) | 614            | 0.92<br>(0.83, 1.02) | 678            | 0.95<br>(0.87, 1.05) | 688            | 0.96<br>(0.87, 1.05) |
|                               | 0 day          | *              | 0.08<br>(0.02, 0.31) | *              | 0.10<br>(0.02, 0.40) | *              | 0.08<br>(0.02, 0.31) | *              | 0.10<br>(0.03, 0.42) | *              | 0.08<br>(0.02, 0.31) | *              | 0.08<br>(0.02, 0.31) |
|                               | 1-7 days       | 157            | 0.88<br>(0.74, 1.04) | 157            | 1.11<br>(0.86, 1.43) | 157            | 0.88<br>(0.74, 1.04) | 108            | 0.85<br>(0.69, 1.05) | 154            | 0.88<br>(0.74, 1.04) | 157            | 0.88<br>(0.75, 1.04) |
|                               | 8-14 days      | 180            | 1.03<br>(0.88, 1.21) | 180            | 1.27<br>(1.00, 1.59) | 180            | 1.03<br>(0.88, 1.21) | 114            | 1.08<br>(0.88, 1.34) | 168            | 1.04<br>(0.88, 1.21) | 180            | 1.04<br>(0.89, 1.22) |
|                               | 15-21 days     | 158            | 0.96<br>(0.81, 1.14) | 158            | 1.15<br>(0.93, 1.44) | 158            | 0.96<br>(0.81, 1.14) | 89             | 0.98<br>(0.78, 1.24) | 141            | 0.97<br>(0.82, 1.14) | 158            | 0.97<br>(0.82, 1.14) |
|                               | 22-28 days     | 152            | 1.00<br>(0.85, 1.19) | 152            | 1.18<br>(0.96, 1.44) | 152            | 1.00<br>(0.84, 1.19) | 72             | 0.97<br>(0.75, 1.25) | 117            | 1.02<br>(0.86, 1.20) | 152            | 1.01<br>(0.85, 1.20) |
| <b>BNT162b2 mRNA vaccine</b>  | baseline       | 1277           | 1.00                 | 607            | 1.00                 | 1277           | 1.00                 | 887            | 1.00                 | 1167           | 1.00                 | 1213           | 1.00                 |
|                               | -28 to -1 days | 428            | 0.88<br>(0.78, 0.99) |                |                      | 428            | 0.87<br>(0.78, 0.98) | 422            | 0.88<br>(0.78, 1.00) | 424            | 0.88<br>(0.78, 0.98) | 391            | 0.89<br>(0.79, 1.01) |
|                               | 0 day          | *              | 0.22<br>(0.08, 0.58) | *              | 0.28<br>(0.10, 0.79) | *              | 0.22<br>(0.08, 0.58) | *              | 0.22<br>(0.08, 0.60) | *              | 0.22<br>(0.08, 0.58) | *              | 0.24<br>(0.09, 0.65) |
|                               | 1-7 days       | 95             | 0.74<br>(0.60, 0.92) | 95             | 0.94<br>(0.69, 1.28) | 95             | 0.74<br>(0.60, 0.92) | 93             | 0.74<br>(0.60, 0.92) | 94             | 0.74<br>(0.60, 0.92) | 83             | 0.72<br>(0.57, 0.90) |
|                               | 8-14 days      | 121            | 0.94<br>(0.77, 1.13) | 121            | 1.11<br>(0.85, 1.45) | 121            | 0.93<br>(0.77, 1.13) | 107            | 0.88<br>(0.71, 1.08) | 121            | 0.93<br>(0.77, 1.13) | 110            | 0.94<br>(0.77, 1.15) |
|                               | 15-21 days     | 116            | 0.89<br>(0.73, 1.08) | 118            | 1.06<br>(0.83, 1.35) | 118            | 0.90<br>(0.74, 1.09) | 95             | 0.95<br>(0.76, 1.18) | 117            | 0.90<br>(0.74, 1.09) | 110            | 0.94<br>(0.77, 1.15) |
|                               | 22-28 days     | 107            | 0.85<br>(0.70, 1.04) | 107            | 0.95<br>(0.75, 1.20) | 107            | 0.85<br>(0.69, 1.03) | 66             | 0.85<br>(0.66, 1.10) | 107            | 0.85<br>(0.69, 1.04) | 102            | 0.88<br>(0.71, 1.08) |

|                                 |                |     |                         |  |     |                         |     |                         |     |                         |     |                         |
|---------------------------------|----------------|-----|-------------------------|--|-----|-------------------------|-----|-------------------------|-----|-------------------------|-----|-------------------------|
| <b>SARS-CoV-2 positive test</b> | baseline       | 173 | 1.00                    |  |     |                         |     |                         | 160 | 1.00                    |     |                         |
|                                 | -28 to -1 days | 83  | 1.98<br>(1.50, 2.61)    |  |     |                         |     |                         | 83  | 1.98<br>(1.51, 2.61)    |     |                         |
|                                 | 0 day          | 41  | 25.93<br>(18.26, 36.83) |  |     |                         |     |                         | 39  | 26.01<br>(18.31, 36.95) |     |                         |
|                                 | 1-7 days       | 66  | 5.85<br>(4.36, 7.86)    |  |     |                         |     |                         | 66  | 5.88<br>(4.38, 7.90)    |     |                         |
|                                 | 8-14 days      | 51  | 4.29<br>(3.11, 5.92)    |  |     |                         |     |                         | 51  | 4.30<br>(3.12, 5.93)    |     |                         |
|                                 | 15-21 days     | 15  | 1.19<br>(0.70, 2.03)    |  |     |                         |     |                         | 15  | 1.19<br>(0.70, 2.03)    |     |                         |
|                                 | 22-28 days     | 19  | 1.40<br>(0.87, 2.25)    |  |     |                         |     |                         | 19  | 1.40<br>(0.87, 2.26)    |     |                         |
| <b>Anaphylaxis</b>              |                |     |                         |  |     |                         |     |                         |     |                         |     |                         |
| <b>ChAdOx1nCoV-19 vaccine</b>   | baseline       | 339 | 1.00                    |  | 339 | 1.00                    | 228 | 1.00                    | 307 | 1.00                    | 339 | 1.00                    |
|                                 | -28 to -1 days | 105 | 0.88<br>(0.69, 1.11)    |  | 105 | 0.87<br>(0.69, 1.10)    | 93  | 0.91<br>(0.70, 1.20)    | 104 | 0.88<br>(0.69, 1.11)    | 105 | 0.86<br>(0.68, 1.09)    |
|                                 | 0 day          | 45  | 10.75<br>(7.75, 14.92)  |  | 45  | 10.68<br>(7.70, 14.81)  | 26  | 9.03<br>(5.77, 14.13)   | 43  | 10.73<br>(7.74, 14.89)  | 45  | 10.57<br>(7.62, 14.66)  |
|                                 | 1-7 days       | 49  | 1.72<br>(1.25, 2.36)    |  | 49  | 1.70<br>(1.24, 2.34)    | 31  | 1.61<br>(1.05, 2.46)    | 47  | 1.71<br>(1.24, 2.34)    | 49  | 1.69<br>(1.23, 2.32)    |
|                                 | 8-14 days      | 23  | 0.83<br>(0.54, 1.28)    |  | 23  | 0.82<br>(0.53, 1.27)    | 17  | 1.00<br>(0.58, 1.71)    | 21  | 0.83<br>(0.54, 1.28)    | 23  | 0.81<br>(0.53, 1.26)    |
|                                 | 15-21 days     | 28  | 1.05<br>(0.70, 1.57)    |  | 28  | 1.04<br>(0.69, 1.55)    | 11  | 0.72<br>(0.38, 1.39)    | 23  | 1.05<br>(0.70, 1.57)    | 28  | 1.03<br>(0.69, 1.54)    |
|                                 | 22-28 days     | 23  | 0.96<br>(0.62, 1.49)    |  | 23  | 0.95<br>(0.61, 1.47)    | 13  | 1.08<br>(0.58, 2.00)    | 19  | 0.97<br>(0.63, 1.51)    | 23  | 0.94<br>(0.61, 1.46)    |
| <b>BNT162b2 mRNA vaccine</b>    | baseline       | 108 | 1.00                    |  | 109 | 1.00                    | 70  | 1.00                    | 98  | 1.00                    | 105 | 1.00                    |
|                                 | -28 to -1 days | 30  | 0.75<br>(0.49, 1.13)    |  | 30  | 0.73<br>(0.48, 1.10)    | 27  | 0.67<br>(0.42, 1.05)    | 29  | 0.73<br>(0.48, 1.11)    | 29  | 0.73<br>(0.48, 1.11)    |
|                                 | 0 day          | 29  | 19.29<br>(12.64, 29.44) |  | 29  | 18.64<br>(12.22, 28.42) | 28  | 18.62<br>(11.81, 29.35) | 28  | 18.87<br>(12.38, 28.78) | 26  | 17.59<br>(11.27, 27.46) |
|                                 | 1-7 days       | 16  | 1.51                    |  | 16  | 1.46                    | 15  | 1.44                    | 15  | 1.48                    | 14  | 1.34                    |

|                                     |                   |    |                            |  |  |    |                      |    |                      |    |                            |    |                      |
|-------------------------------------|-------------------|----|----------------------------|--|--|----|----------------------|----|----------------------|----|----------------------------|----|----------------------|
|                                     |                   |    | (0.88, 2.58)               |  |  |    | (0.86, 2.50)         |    | (0.81, 2.55)         |    | (0.87, 2.53)               |    | (0.76, 2.37)         |
|                                     | 8-14 days         | 21 | 1.93<br>(1.19, 3.13)       |  |  | 21 | 1.87<br>(1.16, 3.02) | 20 | 1.93<br>(1.15, 3.24) | 21 | 1.89<br>(1.17, 3.06)       | 19 | 1.78<br>(1.07, 2.95) |
|                                     | 15-21 days        | 12 | 1.14<br>(0.62, 2.08)       |  |  | 12 | 1.10<br>(0.60, 2.01) | 9  | 1.03<br>(0.50, 2.10) | 12 | 1.11<br>(0.61, 2.03)       | 11 | 1.06<br>(0.56, 2.00) |
|                                     | 22-28 days        | 10 | 0.94<br>(0.49, 1.82)       |  |  | 10 | 0.91<br>(0.47, 1.76) | 6  | 0.78<br>(0.33, 1.85) | 10 | 0.93<br>(0.48, 1.78)       | 10 | 0.96<br>(0.50, 1.85) |
| <b>SARS-CoV-2<br/>positive test</b> | baseline          | 43 | 1.00                       |  |  |    |                      |    |                      | 40 | 1.00                       |    |                      |
|                                     | -28 to -1<br>days | 14 | 1.55<br>(0.81, 2.97)       |  |  |    |                      |    |                      | 14 | 1.56<br>(0.81, 2.97)       |    |                      |
|                                     | 0 day             | 9  | 25.83<br>(12.17,<br>54.84) |  |  |    |                      |    |                      | 9  | 25.67<br>(12.10,<br>54.46) |    |                      |
|                                     | 1-7 days          | 8  | 3.23<br>(1.48, 7.06)       |  |  |    |                      |    |                      | 8  | 3.21<br>(1.47, 7.02)       |    |                      |
|                                     | 8-14 days         | *  | 0.41<br>(0.06, 2.98)       |  |  |    |                      |    |                      | *  | 0.41<br>(0.06, 2.97)       |    |                      |
|                                     | 15-21 days        | *  | 0.38<br>(0.05, 2.78)       |  |  |    |                      |    |                      | *  | 0.38<br>(0.05, 2.77)       |    |                      |
|                                     | 22-28 days        | 5  | 1.74<br>(0.68, 4.45)       |  |  |    |                      |    |                      | 5  | 1.73<br>(0.68, 4.43)       |    |                      |

**Supplementary table 8: Measures of effect of vaccinations and SARS-CoV-2 infections presented in absolute terms, number needed to expose for one excess event; excess events due to exposure; excess events per 10 million exposed. Only associations significant at the 0.01 level were reported over the 8-28 days post exposure. When IRR were not significant over the 8-28 days post-vaccine, absolute measures were not given.**

|                               | <b>IRR (95% CI)<br/>8-28 days*</b> | <b>Number needed to expose to<br/>cause one excess event (95% CI)</b> | <b>Excess events per 10,000,000<br/>exposed (95% CI)</b> |
|-------------------------------|------------------------------------|-----------------------------------------------------------------------|----------------------------------------------------------|
| <b>Thrombocytopenia</b>       |                                    |                                                                       |                                                          |
| with ChAdOx1nCoV-19 vaccine   | 1.23 (1.14, 1.33)                  | 92714 (69872, 141171)                                                 | 107 (71, 143)                                            |
| with BNT162b2 mRNA vaccine    | 1.06 (0.97, 1.16)                  | *                                                                     | *                                                        |
| with SARS-CoV-2 infection     | 2.85 (2.42, 3.35)                  | 10710 (9910, 11848)                                                   | 934 (844, 1009)                                          |
| <b>Venous thromboembolism</b> |                                    |                                                                       |                                                          |
| with ChAdOx1nCoV-19 vaccine   | 1.06 (1.01, 1.12)                  | 152066 (80337, 869363)                                                | 66 (11, 124)                                             |
| with BNT162b2 mRNA vaccine    | 0.91 (0.83, 1.01)                  | *                                                                     | *                                                        |
| with SARS-CoV-2 infection     | 8.06 (7.49, 8.66)                  | 792 (785, 801)                                                        | 12614 (12479, 12738)                                     |
| <b>Arterial thrombosis</b>    |                                    |                                                                       |                                                          |
| with ChAdOx1nCoV-19 vaccine   | 1.02 (0.99, 1.05)                  | *                                                                     | *                                                        |
| with BNT162b2 mRNA vaccine    | 1.00 (0.97, 1.03)                  | *                                                                     | *                                                        |
| with SARS-CoV-2 infection     | 2.53 (2.38, 2.70)                  | 1794 (1723, 1871)                                                     | 5573 (5344, 5802)                                        |
| <b>CVST</b>                   |                                    |                                                                       |                                                          |
| with ChAdOx1nCoV-19 vaccine   | 2.37 (1.34, 4.21)                  | 1356817 (1028657, 3091145)                                            | 7 (3, 10)                                                |
| with BNT162b2 mRNA vaccine    | 1.93 (0.87, 4.28)                  | *                                                                     | *                                                        |

|                                             |                    |                          |                   |
|---------------------------------------------|--------------------|--------------------------|-------------------|
| with SARS-CoV-2 infection                   | 7.81 (1.64, 37.10) | 504297 (451907, 1126798) | 20 (9, 22)        |
| <b>Ischaemic stroke</b>                     |                    |                          |                   |
| with ChAdOx1nCoV-19 vaccine                 | 1.04 (0.99, 1.08)  | *                        | *                 |
| with BNT162b2 mRNA vaccine                  | 1.06 (1.01, 1.12)  | 69567 (36752, 397713)    | 143 (25, 272)     |
| with SARS-CoV-2 infection                   | 2.14 (1.93, 2.38)  | 5885 (5407, 6506)        | 1699 (1536, 1849) |
| <b>Myocardial infarction</b>                |                    |                          |                   |
| with ChAdOx1nCoV-19 vaccine                 | 1.01 (0.98, 1.04)  | *                        | *                 |
| with BNT162b2 mRNA vaccine                  | 0.98 (0.95, 1.02)  | *                        | *                 |
| with SARS-CoV-2 infection                   | 2.58 (2.39, 2.80)  | 2752 (2622, 2898)        | 3633 (3450, 3814) |
| <b>Other rare arterial thrombotic event</b> |                    |                          |                   |
| with ChAdOx1nCoV-19 vaccine                 | 1.08 (0.95, 1.22)  | *                        | *                 |
| with BNT162b2 mRNA vaccine                  | 1.08 (0.94, 1.25)  | *                        | *                 |
| with SARS-CoV-2 infection                   | 3.72 (2.90, 4.77)  | 18504 (17119, 20651)     | 540 (484, 584)    |
